# Supplementary material for: Biological Effects in Cancer Cells of Mono- and Bidentate Conjugation of Cisplatin on PAMAM Dendrimers: A Comparative Study
Source: MDPI journal article supplement (doi:10.3390/pharmaceutics15020689), 2023-02-17
Supplement: s1 [file s1]

## Supplementary materials

# Biological effects in cancer cells of mono and bidentate conjugation of cisplatin on PAMAM dendrimers: a comparative study

Cláudia Camacho<sup>1</sup>, Dina Maciel<sup>1</sup>, Helena Tomás<sup>1</sup> and João Rodrigues <sup>1\*</sup>

<sup>1</sup>CQM - Centro de Química da Madeira, MMRG, Universidade da Madeira, Campus da Penteada, 9000-390 Funchal, Portugal

\*Correspondence: joaoc@staff.uma.pt

### Figure Index

|                                                                                                                                                                                                                               |    |
|-------------------------------------------------------------------------------------------------------------------------------------------------------------------------------------------------------------------------------|----|
| <b>Figure S1:</b> Standard curve of Hg using several dilutions: 0.2; 0.37; 0.54; 0.71; 0.88; 1.05; 1.22 and 1.39 mg/mL. The absorbance was measured at 550 nm. ....                                                           | 5  |
| <b>Figure S2:</b> <sup>1</sup> H-NMR spectrum of monodentate G0.5(COOPt(NH <sub>3</sub> ) <sub>2</sub> Cl) <sub>8</sub> in D <sub>2</sub> O. ....                                                                             | 5  |
| <b>Figure S3:</b> <sup>1</sup> H-NMR spectrum of anionic PAMAM dendrimer G0.5(COONa) <sub>8</sub> in D <sub>2</sub> O. ....                                                                                                   | 6  |
| <b>Figure S4:</b> <sup>13</sup> C-NMR spectrum of monodentate G0.5(COOPt(NH <sub>3</sub> ) <sub>2</sub> Cl) <sub>8</sub> in D <sub>2</sub> O. ....                                                                            | 6  |
| <b>Figure S5:</b> <sup>13</sup> C-NMR spectrum of anionic PAMAM dendrimer G0.5(COONa) <sub>8</sub> in D <sub>2</sub> O. ....                                                                                                  | 6  |
| <b>Figure S6:</b> <sup>195</sup> Pt-NMR spectrum of monodentate G0.5(COOPt(NH <sub>3</sub> ) <sub>2</sub> Cl) <sub>8</sub> in D <sub>2</sub> O, with K <sub>2</sub> PtCl <sub>4</sub> as external reference (-1631 ppm). .... | 7  |
| <b>Figure S7:</b> <sup>195</sup> Pt-NMR spectrum of cisplatin in D <sub>2</sub> O, with K <sub>2</sub> PtCl <sub>4</sub> as external reference (-1631 ppm). ....                                                              | 7  |
| <b>Figure S8:</b> <sup>1</sup> H-NMR spectrum of anionic PAMAM dendrimer G1.5(COONa) <sub>16</sub> in D <sub>2</sub> O. ....                                                                                                  | 7  |
| <b>Figure S9:</b> <sup>13</sup> C NMR spectrum of anionic PAMAM dendrimer G1.5(COONa) <sub>16</sub> in D <sub>2</sub> O. ....                                                                                                 | 8  |
| <b>Figure S10:</b> <sup>1</sup> H-NMR spectrum of anionic PAMAM dendrimer G2.5(COONa) <sub>32</sub> in D <sub>2</sub> O. ....                                                                                                 | 8  |
| <b>Figure S11:</b> <sup>13</sup> C-NMR spectrum of anionic PAMAM dendrimer G2.5(COONa) <sub>32</sub> in D <sub>2</sub> O. ....                                                                                                | 9  |
| <b>Figure S12:</b> <sup>1</sup> H-NMR spectrum of anionic PAMAM dendrimer G3.5(COONa) <sub>64</sub> in D <sub>2</sub> O. ....                                                                                                 | 9  |
| <b>Figure S13:</b> <sup>13</sup> C-NMR spectrum of anionic PAMAM dendrimer G3.5(COONa) <sub>64</sub> in D <sub>2</sub> O. ....                                                                                                | 10 |
| <b>Figure S14:</b> <sup>1</sup> H-NMR spectrum of monodentate G1.5(COOPt(NH <sub>3</sub> ) <sub>2</sub> Cl) <sub>16</sub> in D <sub>2</sub> O. ....                                                                           | 10 |

|                                                                                                                                                                                                                                                                                                                                                                                |    |
|--------------------------------------------------------------------------------------------------------------------------------------------------------------------------------------------------------------------------------------------------------------------------------------------------------------------------------------------------------------------------------|----|
| <b>Figure S15:</b> $^{13}\text{C}$ NMR spectrum of monodentate $\text{G1.5}(\text{COOPt}(\text{NH}_3)_2\text{Cl})_{16}$ in $\text{D}_2\text{O}$ .                                                                                                                                                                                                                              | 11 |
| <b>Figure S16:</b> $^{195}\text{Pt}$ -NMR spectrum of monodentate $\text{G1.5}(\text{COOPt}(\text{NH}_3)_2\text{Cl})_{16}$ in $\text{D}_2\text{O}$ , with $\text{K}_2\text{PtCl}_4$ as an external reference (-1631 ppm).                                                                                                                                                      | 11 |
| <b>Figure S17:</b> $^1\text{H}$ -NMR spectrum of monodentate $\text{G2.5}(\text{COOPt}(\text{NH}_3)_2\text{Cl})_{32}$ in $\text{D}_2\text{O}$ .                                                                                                                                                                                                                                | 12 |
| <b>Figure S18:</b> $^{13}\text{C}$ -NMR spectrum of monodentate $\text{G2.5}(\text{COOPt}(\text{NH}_3)_2\text{Cl})_{32}$ in $\text{D}_2\text{O}$ .                                                                                                                                                                                                                             | 12 |
| <b>Figure S19:</b> $^{195}\text{Pt}$ -NMR spectrum of monodentate $\text{G2.5}(\text{COOPt}(\text{NH}_3)_2\text{Cl})_{32}$ in $\text{D}_2\text{O}$ , with $\text{K}_2\text{PtCl}_4$ as an external reference (-1631 ppm).                                                                                                                                                      | 13 |
| <b>Figure S20:</b> TOF-MS (ESI+) mass spectrum of monodentate $\text{G0.5}(\text{COOPt}(\text{NH}_3)_2\text{Cl})_8$ metallodendrimer.                                                                                                                                                                                                                                          | 14 |
| <b>Figure S21:</b> TOF-MS (ESI+) mass spectrum of monodentate $\text{G1.5}(\text{COOPt}(\text{NH}_3)_2\text{Cl})_{16}$ metallodendrimer.                                                                                                                                                                                                                                       | 14 |
| <b>Figure S22:</b> TOF-MS (ESI+) mass spectrum of monodentate $\text{G2.5}(\text{COOPt}(\text{NH}_3)_2\text{Cl})_{32}$ metallodendrimer.                                                                                                                                                                                                                                       | 15 |
| <b>Figure S23:</b> FTIR spectra of cisplatin in KBr pellet.                                                                                                                                                                                                                                                                                                                    | 15 |
| <b>Figure S24:</b> FTIR spectra of different generations of anionic PAMAM dendrimers ( $\text{G0.5}$ - $\text{G3.5}$ ) in KBr pellet.                                                                                                                                                                                                                                          | 16 |
| <b>Figure S25:</b> FTIR spectra of metallodendrimers conjugated with cisplatin in monodentate form. The spectra were performed in KBr pellet.                                                                                                                                                                                                                                  | 16 |
| <b>Figure S26:</b> a) Absorption spectra of cisplatin-metallodendrimers in the monodentate form recorded at a concentration of $40\text{ }\mu\text{M}$ in ultrapure water and b) Emission ( $\lambda_{\text{ex}} = 380\text{ nm}$ ) spectra of cisplatin-metallodendrimers in the monodentate form recorded at a concentration of $500\text{ }\mu\text{M}$ in ultrapure water. | 17 |
| <b>Figure S27:</b> a) Absorption spectra of cisplatin recorded at a concentration of $40\text{ }\mu\text{M}$ in ultrapure water and b) Emission ( $\lambda_{\text{ex}} = 380\text{ nm}$ ) spectra of cisplatin recorded at a concentration of $500\text{ }\mu\text{M}$ in ultrapure water.                                                                                     | 17 |
| <b>Figure S28:</b> UV-Vis spectra of anionic PAMAM dendrimers at a concentration of $500\text{ }\mu\text{M}$ in ultrapure water.                                                                                                                                                                                                                                               | 18 |
| <b>Figure S29:</b> Emission ( $\lambda_{\text{ex}} = 380\text{ nm}$ ) of anionic PAMAM dendrimers at a concentration of $500\text{ }\mu\text{M}$ in ultrapure water.                                                                                                                                                                                                           | 18 |
| <b>Figure S30:</b> $^1\text{H}$ -NMR spectrum of bidentate $\text{G0.5}(\text{COOPt}(\text{NH}_3)_2)_4$ in $\text{D}_2\text{O}$ .                                                                                                                                                                                                                                              | 19 |
| <b>Figure S31:</b> $^{13}\text{C}$ -NMR spectrum of bidentate $\text{G0.5}(\text{COOPt}(\text{NH}_3)_2)_4$ in $\text{D}_2\text{O}$ .                                                                                                                                                                                                                                           | 19 |

|                                                                                                                                                                                                                                                                                                                                                                                                                                                                                |    |
|--------------------------------------------------------------------------------------------------------------------------------------------------------------------------------------------------------------------------------------------------------------------------------------------------------------------------------------------------------------------------------------------------------------------------------------------------------------------------------|----|
| <b>Figure S32:</b> $^{195}\text{Pt}$ -NMR spectrum of bidentate $\text{G0.5COO}(\text{Pt}(\text{NH}_3)_2)_4$ in $\text{D}_2\text{O}$ , with $\text{K}_2\text{PtCl}_4$ as external reference (-1631 ppm).....                                                                                                                                                                                                                                                                   | 20 |
| <b>Figure S33:</b> $^1\text{H}$ -NMR spectrum of bidentate $\text{G1.5COO}(\text{Pt}(\text{NH}_3)_2)_8$ in $\text{D}_2\text{O}$ . ....                                                                                                                                                                                                                                                                                                                                         | 20 |
| <b>Figure S34:</b> $^{13}\text{C}$ -NMR spectrum of bidentate $\text{G1.5COOPt}(\text{NH}_3)_2)_8$ in $\text{D}_2\text{O}$ .....                                                                                                                                                                                                                                                                                                                                               | 21 |
| <b>Figure S35:</b> $^{195}\text{Pt}$ -NMR spectrum of bidentate $\text{G1.5COO}(\text{Pt}(\text{NH}_3)_2)_8$ in $\text{D}_2\text{O}$ , with $\text{K}_2\text{PtCl}_4$ as external reference (-1631 ppm).....                                                                                                                                                                                                                                                                   | 21 |
| <b>Figure S36:</b> $^1\text{H}$ -NMR spectrum of bidentate $\text{G2.5COO}(\text{Pt}(\text{NH}_3)_2)_{16}$ in $\text{D}_2\text{O}$ . ....                                                                                                                                                                                                                                                                                                                                      | 22 |
| <b>Figure S37:</b> $^{13}\text{C}$ -NMR spectrum of bidentate $\text{G2.5COO}(\text{Pt}(\text{NH}_3)_2)_{16}$ in $\text{D}_2\text{O}$ . ....                                                                                                                                                                                                                                                                                                                                   | 22 |
| <b>Figure S38:</b> $^{195}\text{Pt}$ -NMR spectrum of bidentate $\text{G2.5COO}(\text{Pt}(\text{NH}_3)_2)_{16}$ in $\text{D}_2\text{O}$ , with $\text{K}_2\text{PtCl}_4$ as external reference (-1631 ppm).....                                                                                                                                                                                                                                                                | 23 |
| <b>Figure S39:</b> $^1\text{H}$ -NMR spectrum of bidentate $\text{G3.5COO}(\text{Pt}(\text{NH}_3)_2)_{32}$ in $\text{D}_2\text{O}$ .....                                                                                                                                                                                                                                                                                                                                       | 23 |
| <b>Figure S40:</b> $^{13}\text{C}$ -NMR spectrum of bidentate $\text{G3.5COO}(\text{Pt}(\text{NH}_3)_2)_{32}$ in $\text{D}_2\text{O}$ .....                                                                                                                                                                                                                                                                                                                                    | 24 |
| <b>Figure S41:</b> $^{195}\text{Pt}$ -NMR spectrum of bidentate $\text{G3.5COO}(\text{Pt}(\text{NH}_3)_2)_{32}$ in $\text{D}_2\text{O}$ , with $\text{K}_2\text{PtCl}_4$ as external reference (-1631 ppm).....                                                                                                                                                                                                                                                                | 24 |
| <b>Figure S42:</b> TOF-MS (ESI+) mass spectrum of bidentate $\text{G0.5COO}(\text{Pt}(\text{NH}_3)_2)_4$ metallodendrimer....                                                                                                                                                                                                                                                                                                                                                  | 25 |
| <b>Figure S43:</b> TOF-MS (ESI+) mass spectrum of bidentate $\text{G1.5COO}(\text{Pt}(\text{NH}_3)_2)_8$ metallodendrimer....                                                                                                                                                                                                                                                                                                                                                  | 26 |
| <b>Figure S44:</b> TOF-MS (MALDI) mass spectrum of bidentate $\text{G2.5COO}(\text{Pt}(\text{NH}_3)_2)_{16}$ metallodendrimer. ....                                                                                                                                                                                                                                                                                                                                            | 26 |
| <b>Figure S45:</b> TOF-MS (ESI+) mass spectrum of bidentate $\text{G3.5COO}(\text{Pt}(\text{NH}_3)_2)_{32}$ metallodendrimer...                                                                                                                                                                                                                                                                                                                                                | 27 |
| <b>Figure S46:</b> FTIR spectrum of metallodendrimers conjugated with cisplatin in bidentate form. The spectrum was performed in KBr pellet. ....                                                                                                                                                                                                                                                                                                                              | 27 |
| <b>Figure S47:</b> a) Absorption spectra of cisplatin-metallodendrimers in the bidentate form recorded at a concentration of 40 $\mu\text{M}$ in ultrapure water and b) Emission ( $\lambda_{\text{ex}} = 380 \text{ nm}$ ) spectra of cisplatin-metallodendrimers in the bidentate form recorded at a concentration of 500 $\mu\text{M}$ in ultrapure water. ....                                                                                                             | 28 |
| <b>Figure S48:</b> Hematoxicity of the free cisplatin and prepared cisplatin-metallodendrimers in healthy human blood. Blood was treated for 3 h with different concentrations (0.1, 1, and 5 $\mu\text{M}$ ) of the metallodendrimers and free cisplatin. The positive and negative control are represented by $\text{C}^+$ and $\text{C}$ , respectively. The results are expressed as mean $\pm$ SD of at least three independent experiments performed in triplicate. .... | 28 |
| <b>Figure S49:</b> Representative UV-visible spectra of cisplatin with increasing concentration of CT-DNA (0, 6.25, 12.5, 18.75, 25, 31.25, 37.5, 43.75 and 50 $\mu\text{M}$ ) in 5 mM Tris-HCl/50 mM NaCl at pH 7.4. The                                                                                                                                                                                                                                                      |    |

inset corresponds to the plot of  $A_0/(A-A_0)$  versus  $1/[DNA]$ , which is used to determine the binding constant. The arrow indicates the direction of increasing the concentration of DNA. .... 29

## Table Index

**Table S1:** Molecular weight of the cisplatin-metallodendrimers in a monodentate form..... 13

**Table S2:** Molecular weight of the cisplatin-metallodendrimers in a bidentate form. .... 25

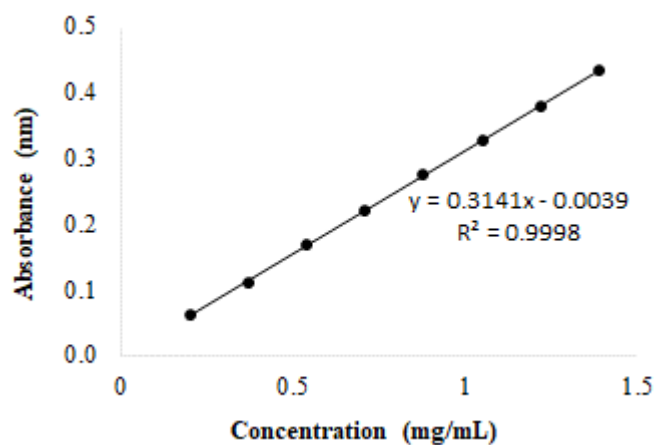

**Figure S1:** Standard curve of Hg using several dilutions: 0.2; 0.37; 0.54; 0.71; 0.88; 1.05; 1.22 and 1.39 mg/mL. The absorbance was measured at 550 nm.

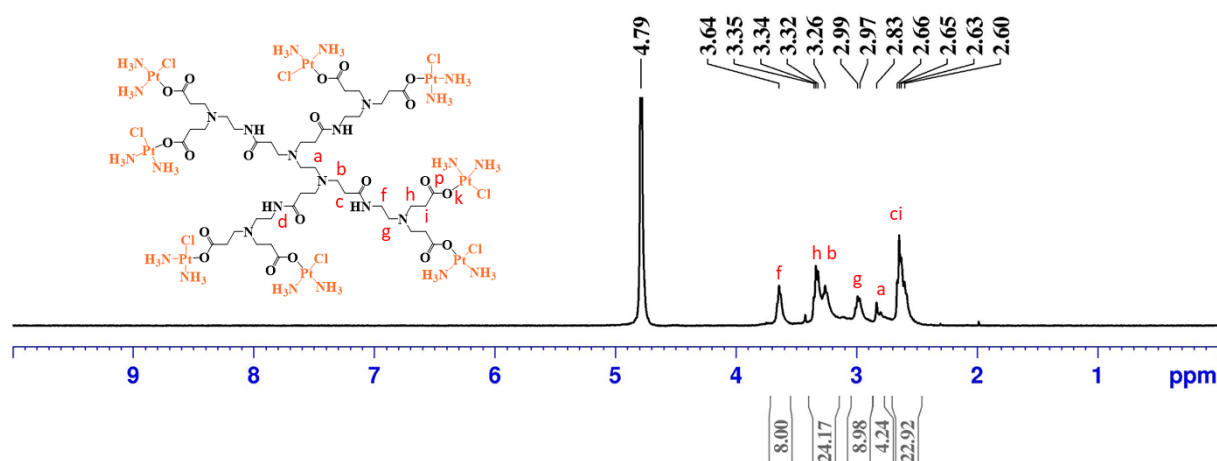

**Figure S2:**  $^1H$ -NMR spectrum of monodentate  $G0.5(COOPt(NH_3)_2Cl)_8$  in  $D_2O$ .

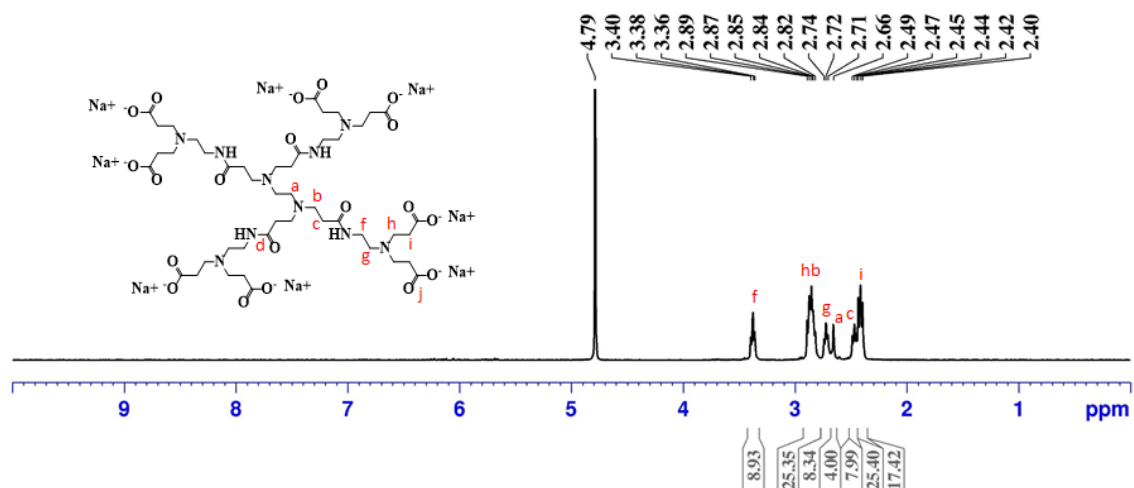

**Figure S3:**  $^1\text{H}$ -NMR spectrum of anionic PAMAM dendrimer  $\text{G0.5}(\text{COONa})_8$  in  $\text{D}_2\text{O}$ .

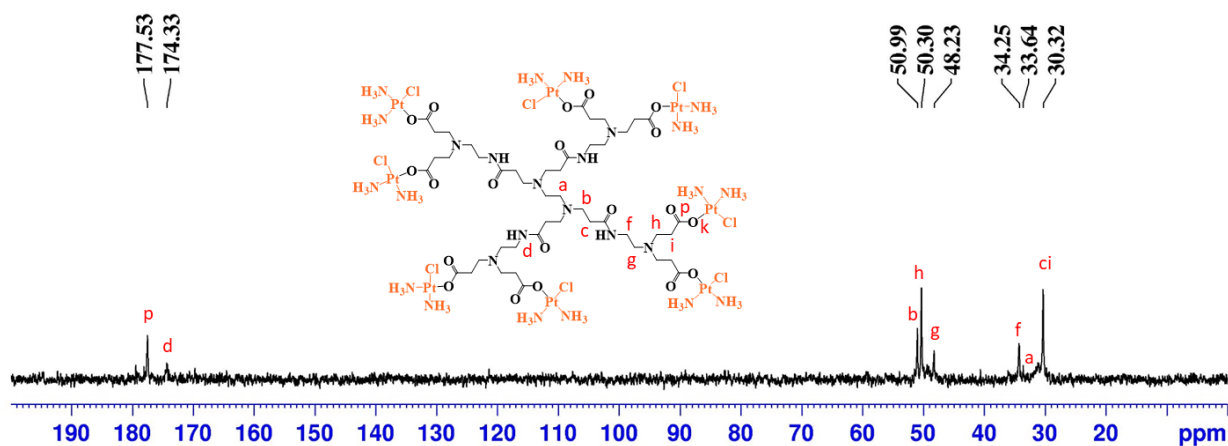

**Figure S4:**  $^{13}\text{C}$ -NMR spectrum of monodentate  $\text{G0.5}(\text{COOPt}(\text{NH}_3)_2\text{Cl})_8$  in  $\text{D}_2\text{O}$ .

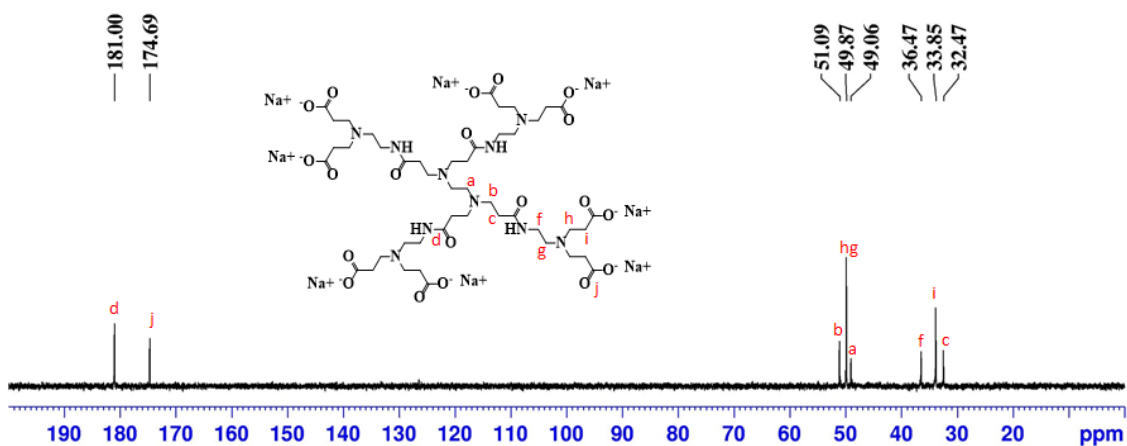

**Figure S5:**  $^{13}\text{C}$ -NMR spectrum of anionic PAMAM dendrimer  $\text{G0.5}(\text{COONa})_8$  in  $\text{D}_2\text{O}$ .

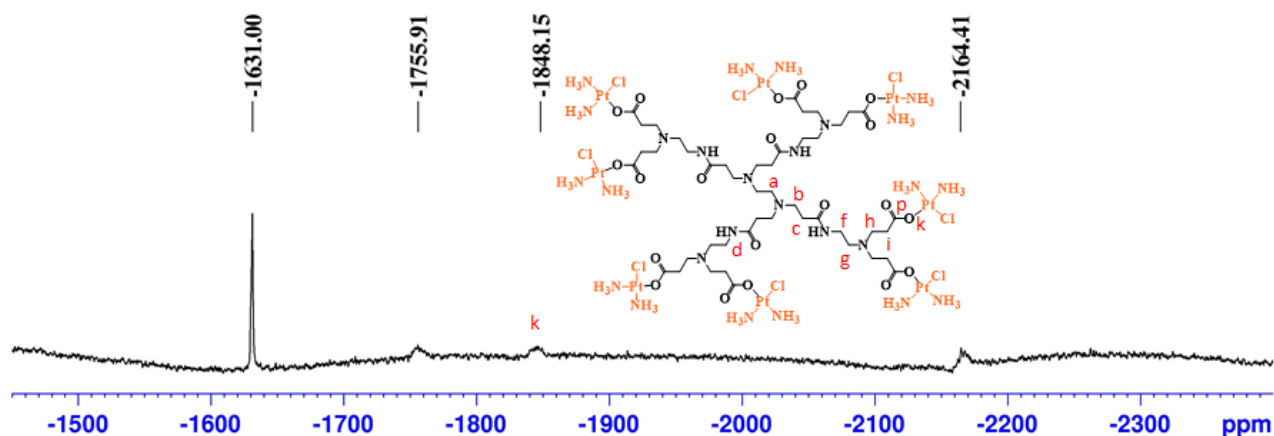

**Figure S6:**  $^{195}\text{Pt}$ -NMR spectrum of monodentate  $\text{G0.5}(\text{COOPt}(\text{NH}_3)_2\text{Cl})_8$  in  $\text{D}_2\text{O}$ , with  $\text{K}_2\text{PtCl}_4$  as external reference (-1631 ppm).

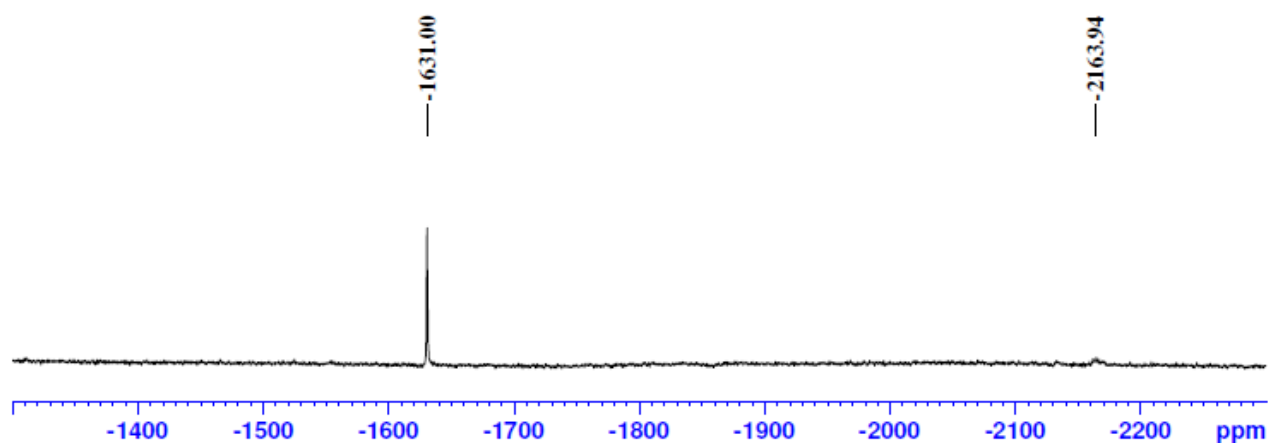

**Figure S7:**  $^{195}\text{Pt}$ -NMR spectrum of cisplatin in  $\text{D}_2\text{O}$ , with  $\text{K}_2\text{PtCl}_4$  as external reference (-1631 ppm).

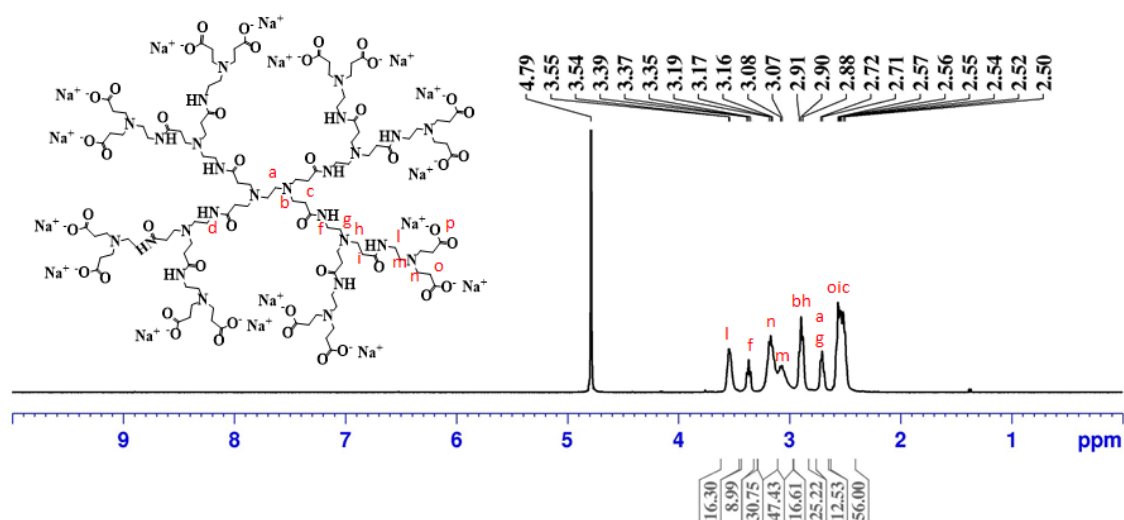

**Figure S8:**  $^1\text{H}$ -NMR spectrum of anionic PAMAM dendrimer  $\text{G1.5}(\text{COONa})_{16}$  in  $\text{D}_2\text{O}$ .

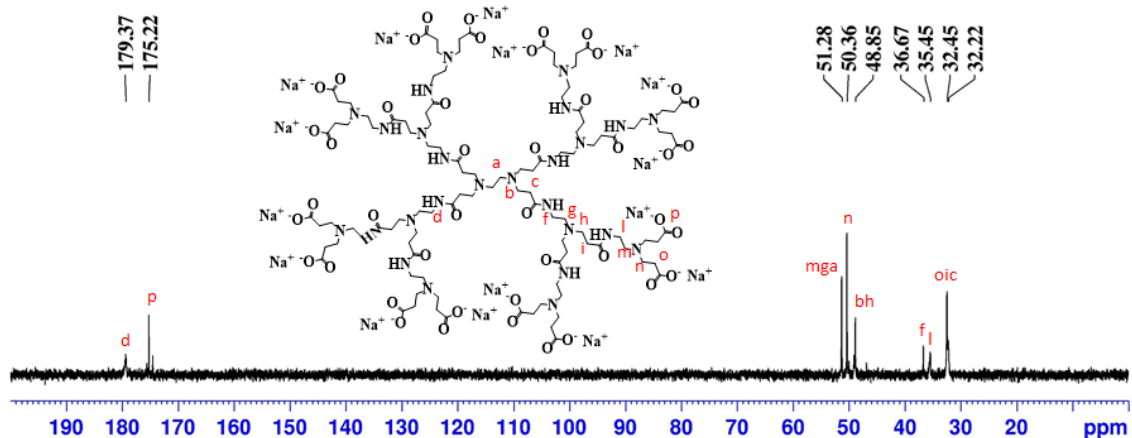

**Figure S9:**  $^{13}\text{C}$  NMR spectrum of anionic PAMAM dendrimer  $\text{G1.5}(\text{COONa})_{16}$  in  $\text{D}_2\text{O}$ .

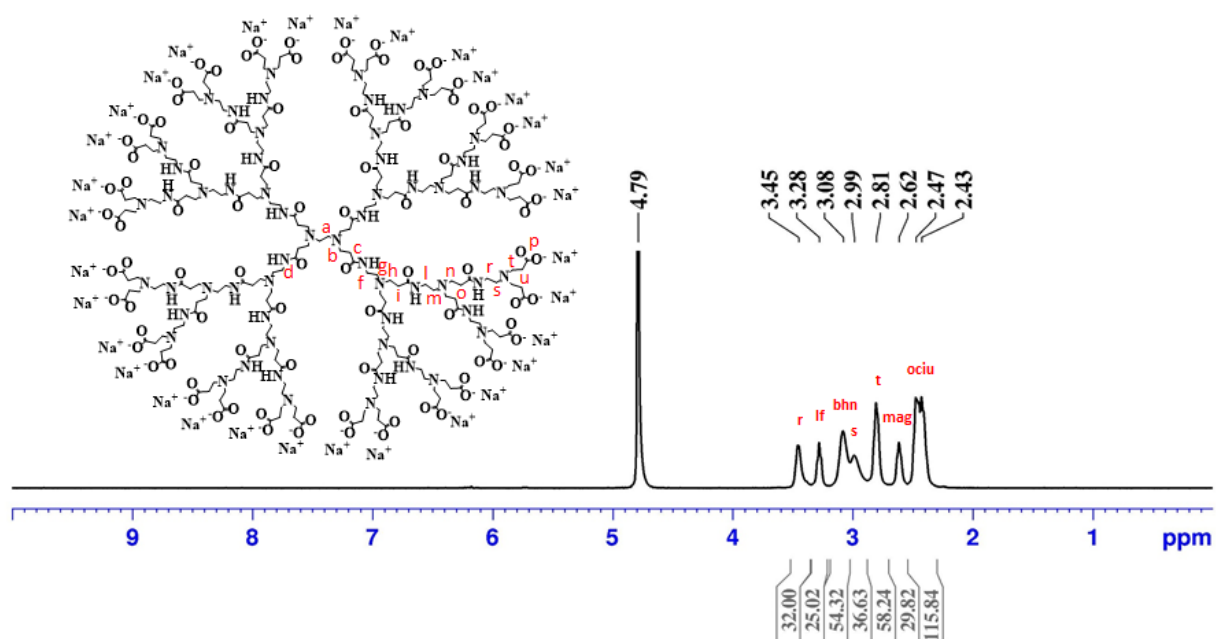

**Figure S10:**  $^1\text{H}$ -NMR spectrum of anionic PAMAM dendrimer  $\text{G2.5}(\text{COONa})_{32}$  in  $\text{D}_2\text{O}$ .



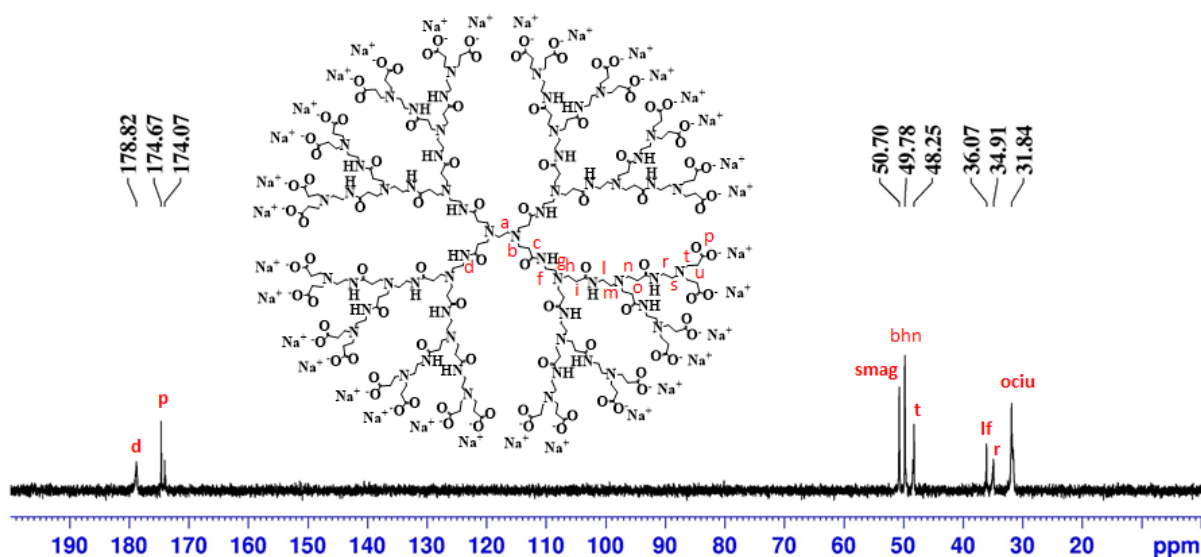

**Figure S11:**  $^{13}\text{C}$ -NMR spectrum of anionic PAMAM dendrimer  $\text{G2.5}(\text{COONa})_{32}$  in  $\text{D}_2\text{O}$ .

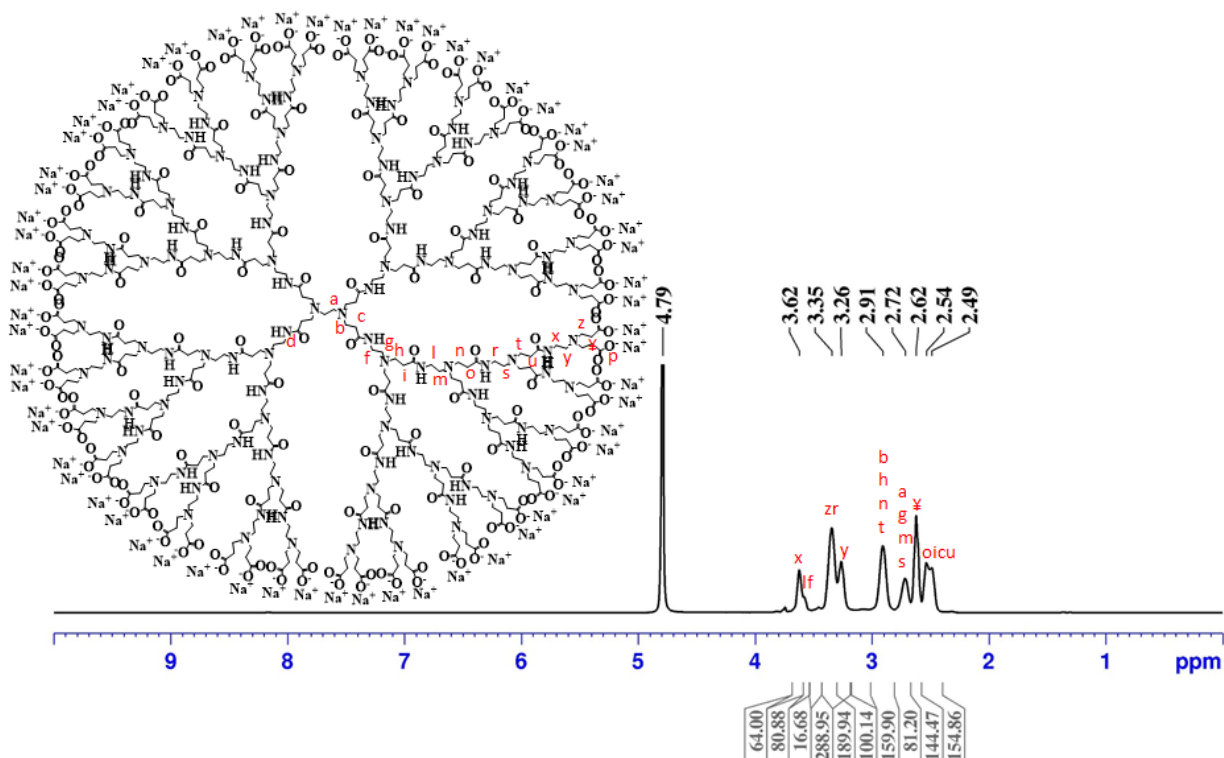

**Figure S12:**  $^1\text{H}$ -NMR spectrum of anionic PAMAM dendrimer  $\text{G3.5}(\text{COONa})_{64}$  in  $\text{D}_2\text{O}$ .

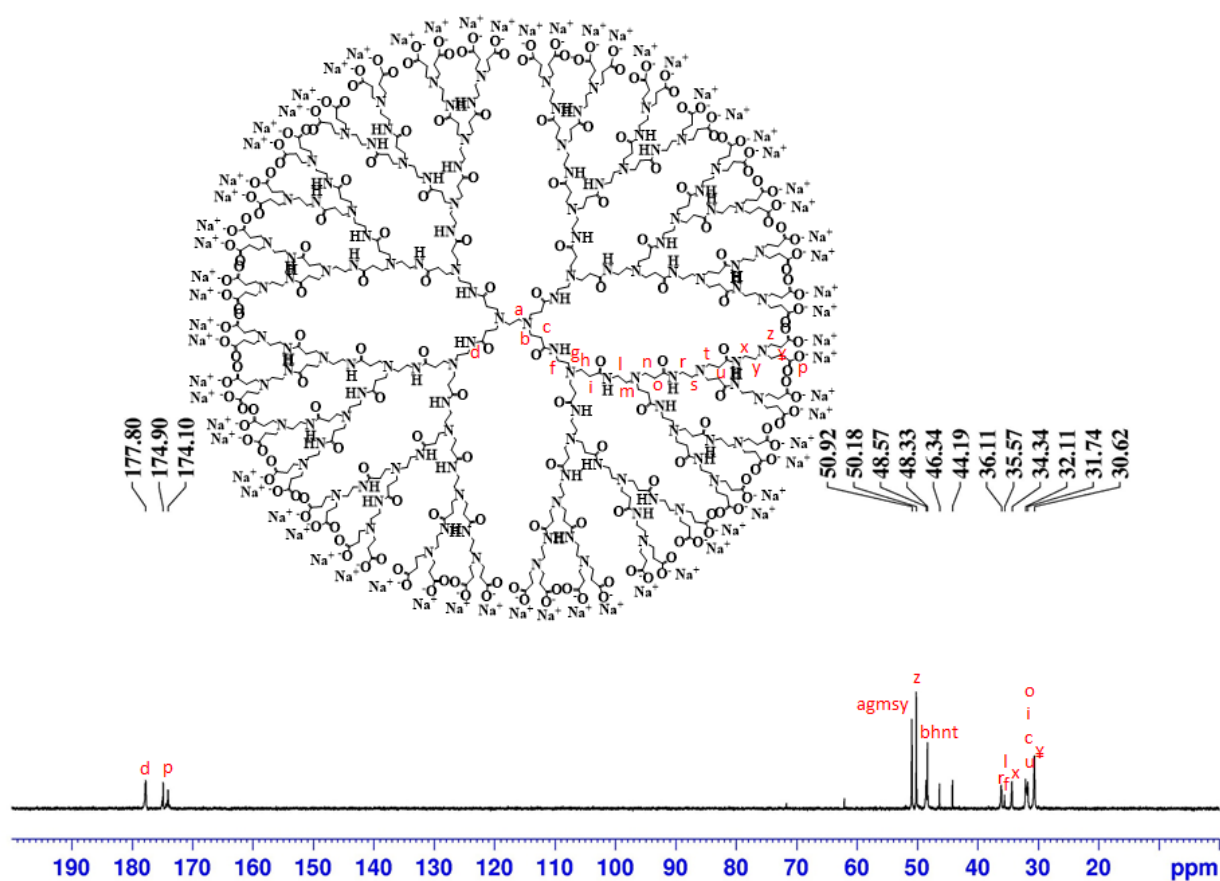

**Figure S13:**  $^{13}\text{C}$ -NMR spectrum of anionic PAMAM dendrimer  $\text{G3.5}(\text{COONa})_{64}$  in  $\text{D}_2\text{O}$ .

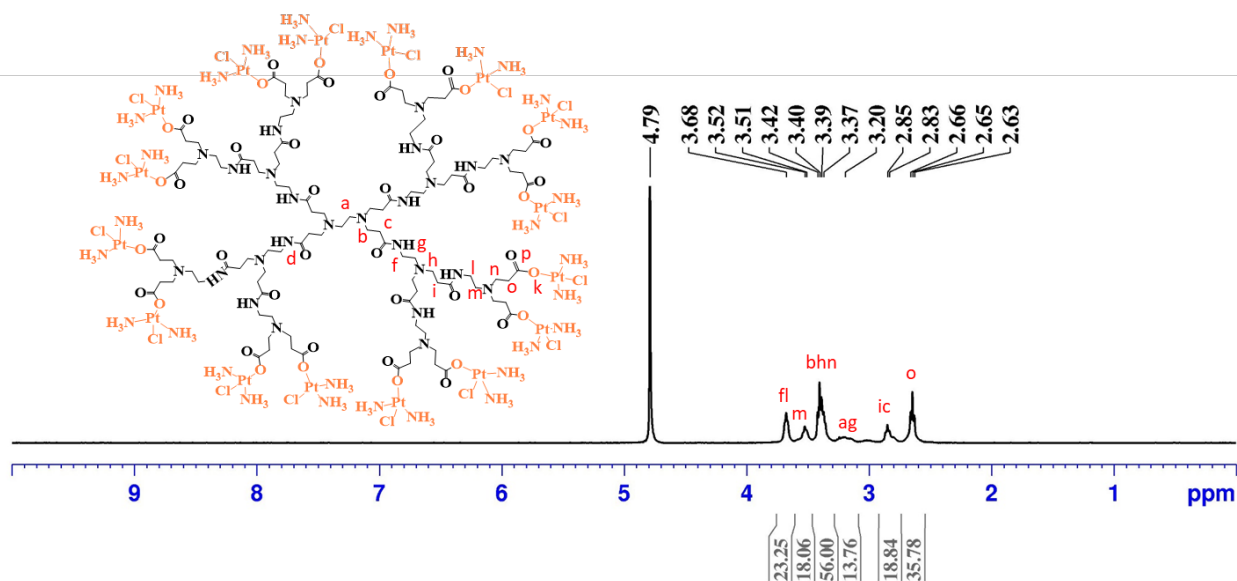

**Figure S14:**  $^1\text{H}$ -NMR spectrum of monodentate  $\text{G1.5}(\text{COOPt}(\text{NH}_3)_2\text{Cl})_{16}$  in  $\text{D}_2\text{O}$ .

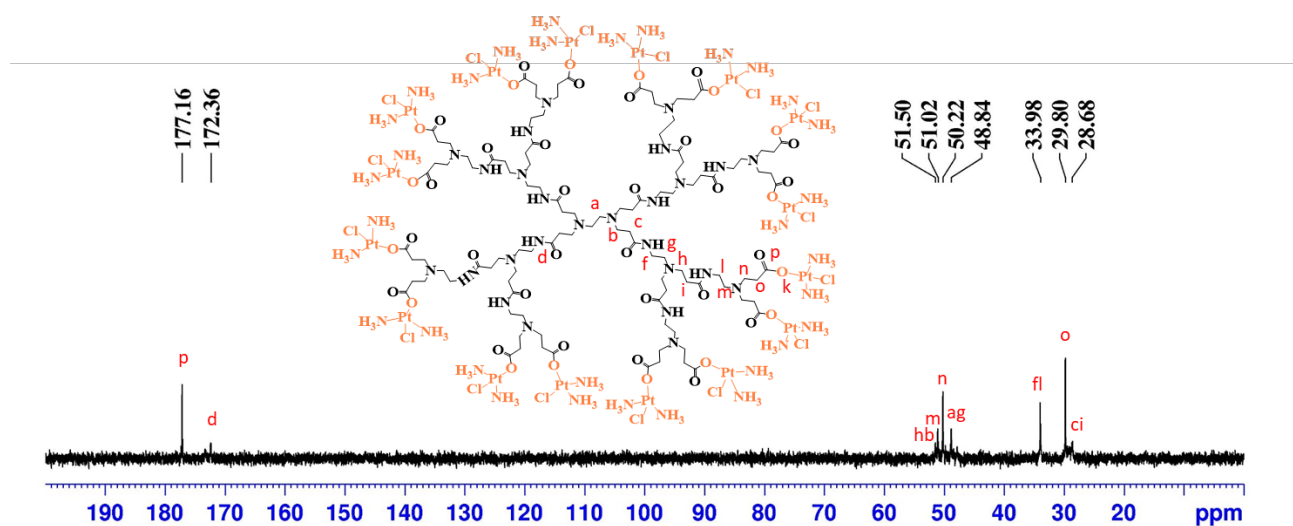

**Figure S15:**  $^{13}\text{C}$  NMR spectrum of monodentate  $\text{G1.5}(\text{COOPt}(\text{NH}_3)_2\text{Cl})_{16}$  in  $\text{D}_2\text{O}$ .

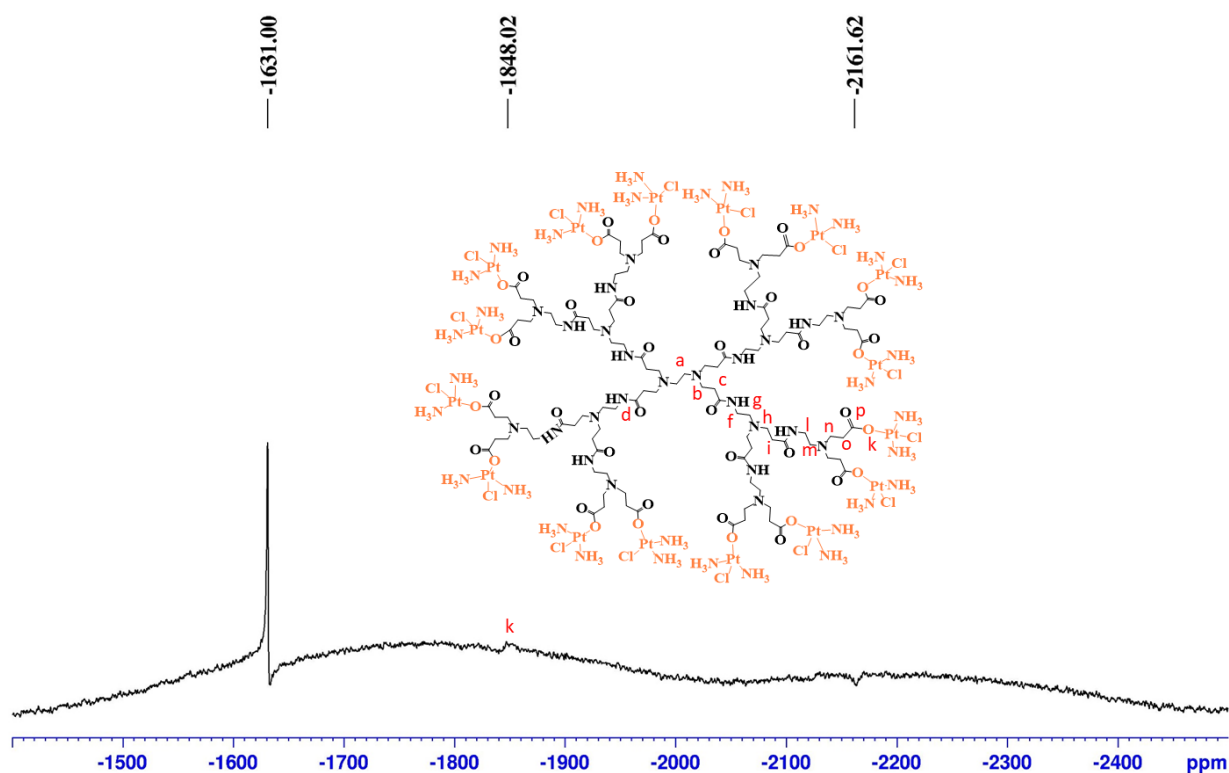

**Figure S16:**  $^{195}\text{Pt}$ -NMR spectrum of monodentate  $\text{G1.5}(\text{COOPt}(\text{NH}_3)_2\text{Cl})_{16}$  in  $\text{D}_2\text{O}$ , with  $\text{K}_2\text{PtCl}_4$  as an external reference (-1631 ppm).

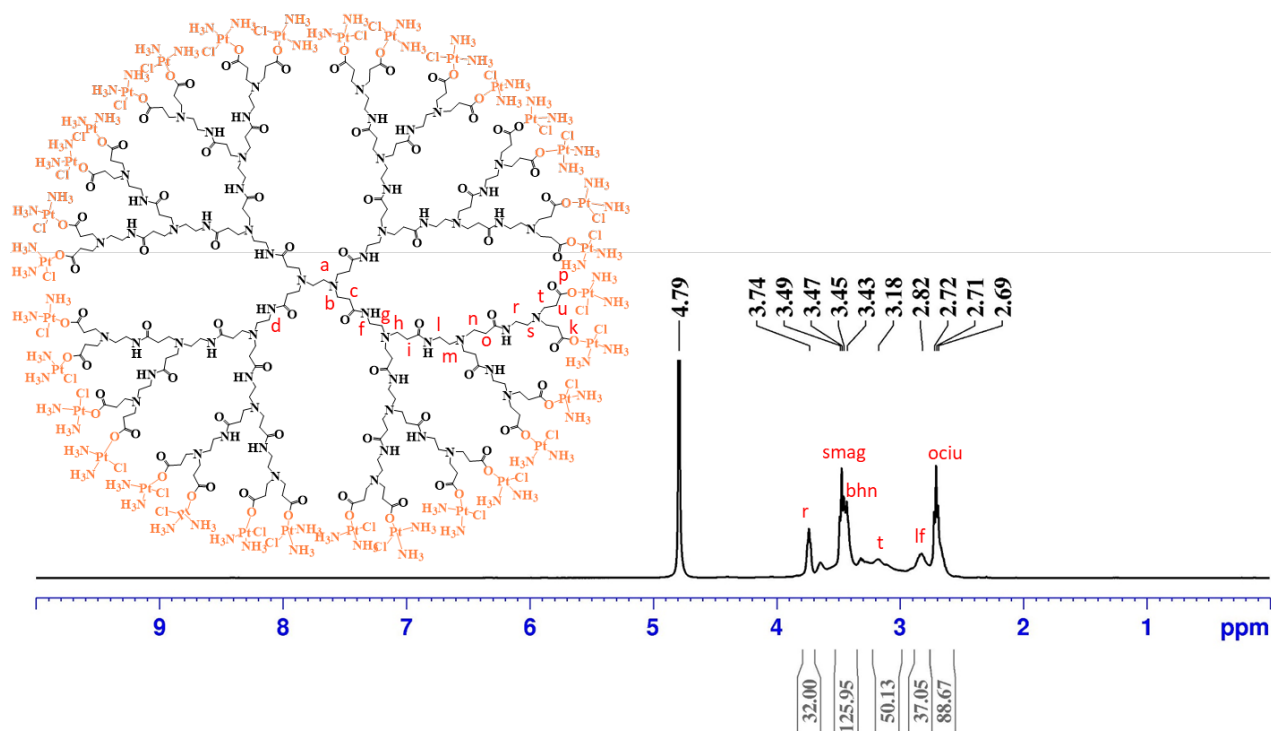

Figure S17:  $^1\text{H}$ -NMR spectrum of monodentate  $\text{G2.5}(\text{COOPt}(\text{NH}_3)_2\text{Cl})_{32}$  in  $\text{D}_2\text{O}$ .

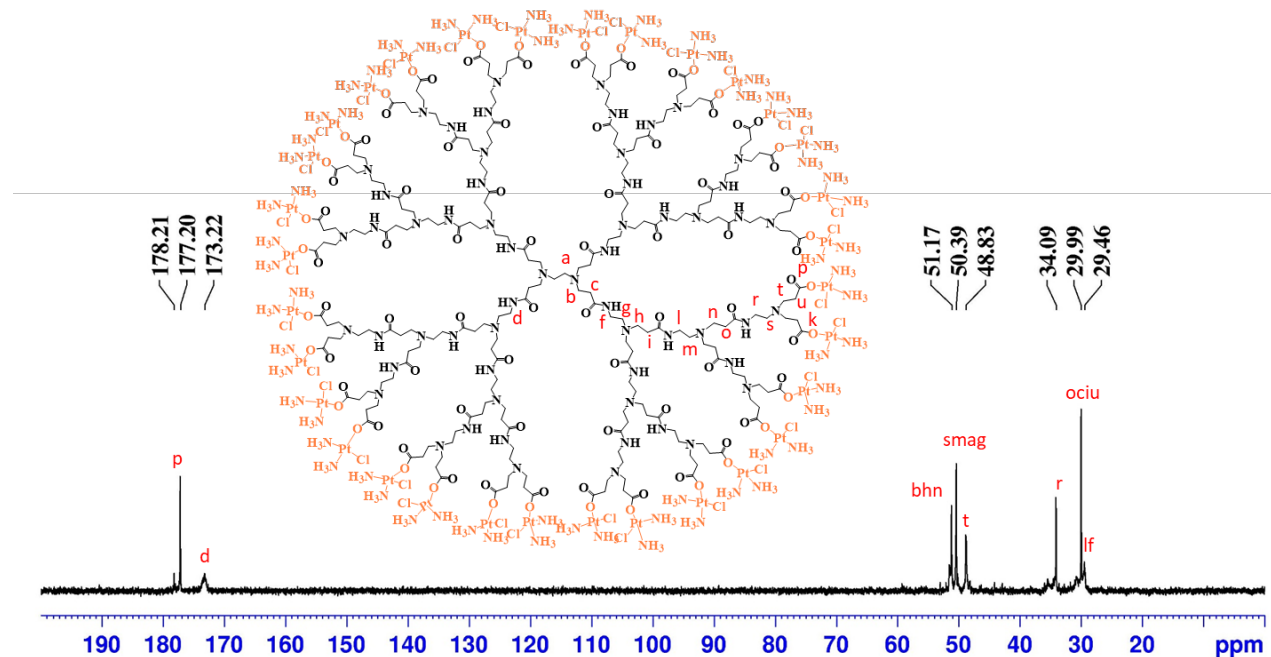

Figure S18:  $^{13}\text{C}$ -NMR spectrum of monodentate  $\text{G2.5}(\text{COOPt}(\text{NH}_3)_2\text{Cl})_{32}$  in  $\text{D}_2\text{O}$ .

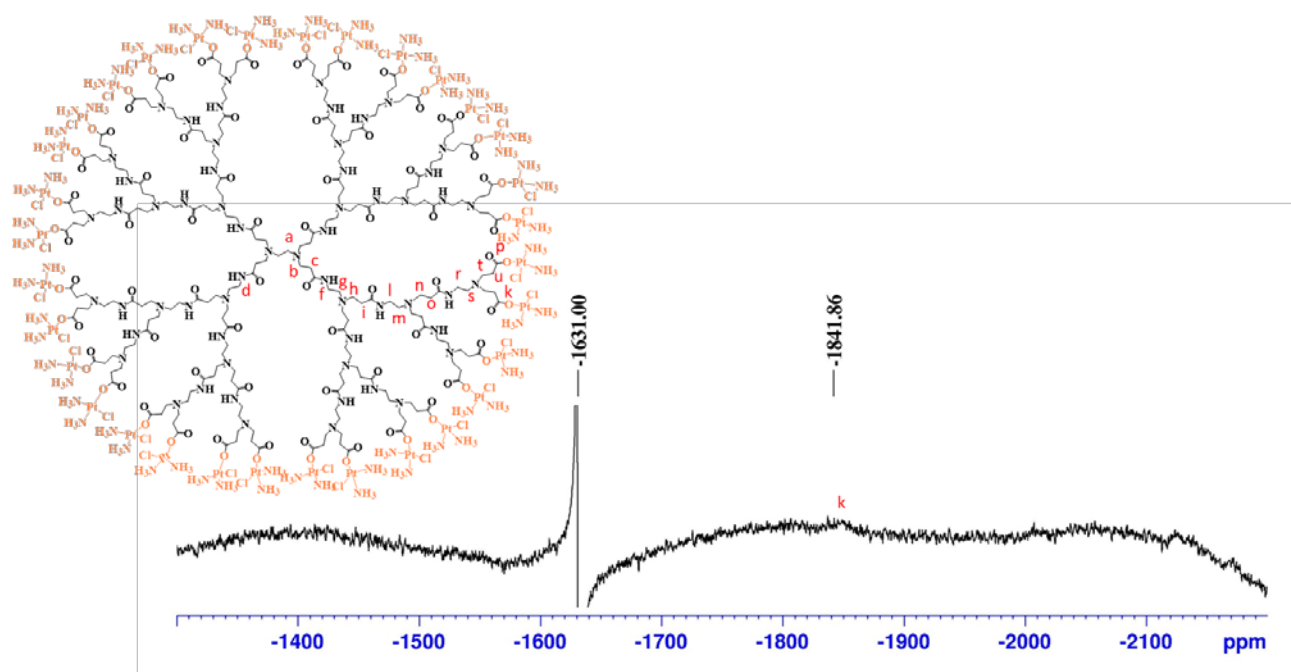

**Figure S19:**  $^{195}\text{Pt}$ -NMR spectrum of monodentate  $\text{G2.5}(\text{COOPt}(\text{NH}_3)_2\text{Cl})_{32}$  in  $\text{D}_2\text{O}$ , with  $\text{K}_2\text{PtCl}_4$  as an external reference (-1631 ppm).

**Table S1:** Molecular weight of the cisplatin-metallodendrimers in a monodentate form.

|                         | $\text{G0.5}(\text{COOPt}(\text{NH}_3)_2\text{Cl})_8$                              | $\text{G1.5}(\text{COOPt}(\text{NH}_3)_2\text{Cl})_{16}$                 | $\text{G2.5}(\text{COOPt}(\text{NH}_3)_2\text{Cl})_{32}$                                  |
|-------------------------|------------------------------------------------------------------------------------|--------------------------------------------------------------------------|-------------------------------------------------------------------------------------------|
| <b>Molecular weight</b> | 3201.90                                                                            | 6800.29                                                                  | 13997.08                                                                                  |
| <b>m/z calculated</b>   | 1606.68                                                                            | 1013.47                                                                  | 974.82                                                                                    |
| <b>m/z found</b>        | 1606.46<br>[M+2H <sup>+</sup> + H <sub>2</sub> O] <sup>2+</sup>                    | 1013.46<br>[M+3H <sup>+</sup> ] <sup>3+</sup>                            | 974.65<br>[M+H <sup>+</sup> ] <sup>+</sup>                                                |
|                         | $\text{C}_{46}\text{H}_{118}\text{Cl}_8\text{N}_{26}\text{O}_{21}\text{Pt}_8^{2+}$ | $\text{C}_{110}\text{H}_{205}\text{N}_{30}\text{O}_{44}\text{Pt}_2^{3+}$ | $\text{C}_{238}\text{H}_{562}\text{Cl}_{29}\text{N}_{116}\text{O}_{92}\text{Pt}_{29}^{+}$ |

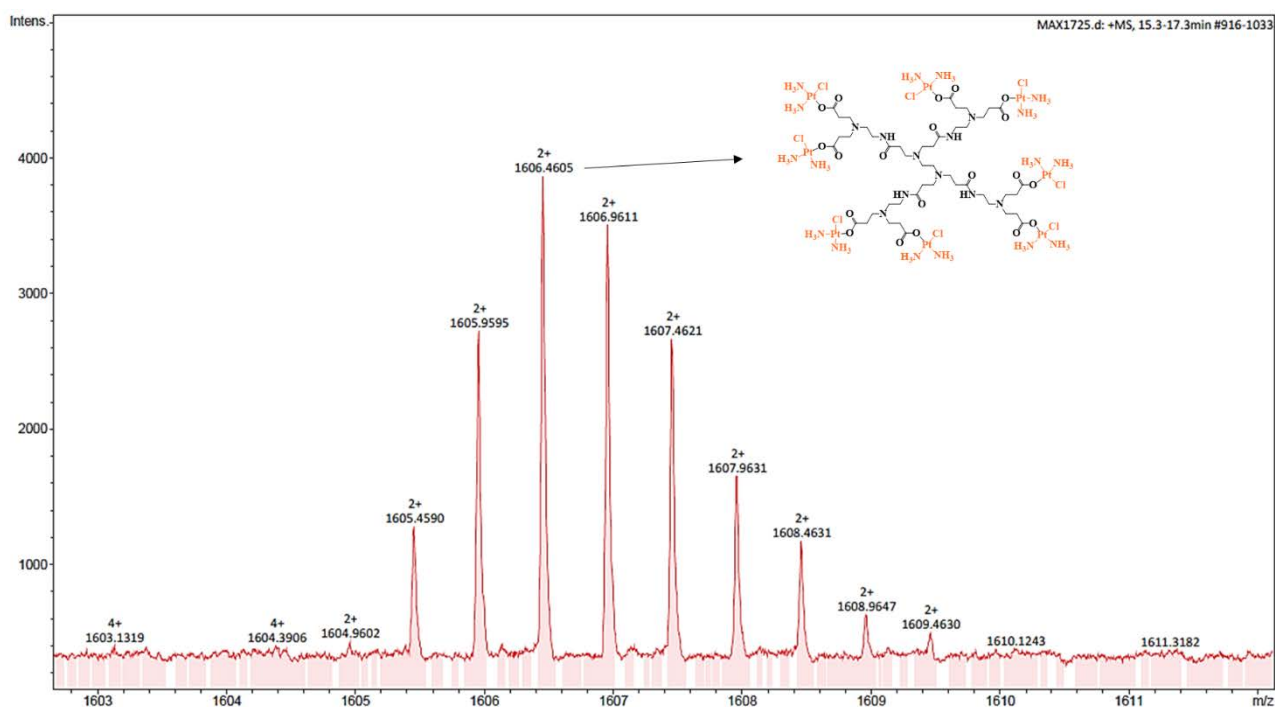

**Figure S20:** TOF-MS (ESI+) mass spectrum of monodentate  $G_{0.5}(\text{COOPt}(\text{NH}_3)_2\text{Cl})_8$  metallodendrimer.

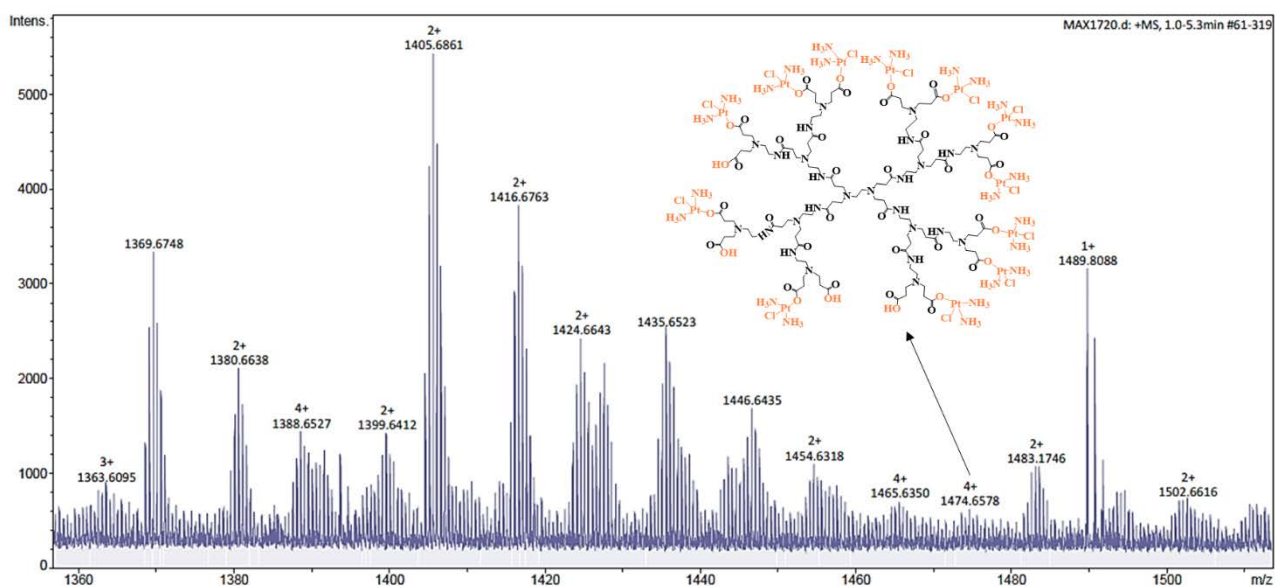

**Figure S21:** TOF-MS (ESI+) mass spectrum of monodentate  $G_{1.5}(\text{COOPt}(\text{NH}_3)_2\text{Cl})_{16}$  metallodendrimer.

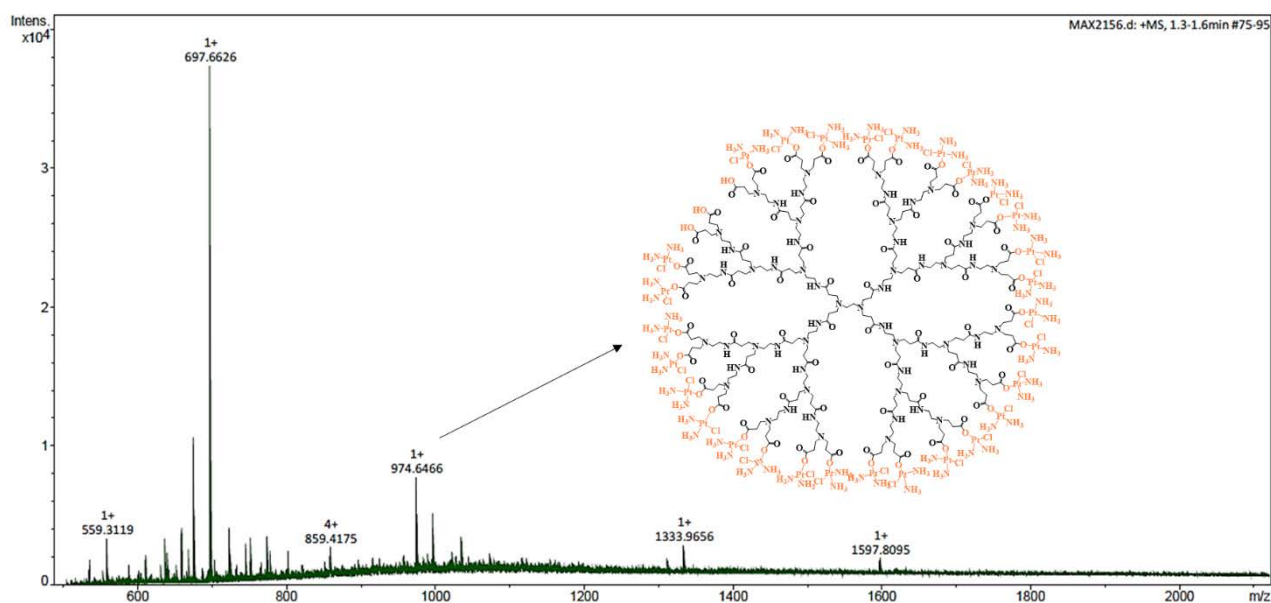

**Figure S22:** TOF-MS (ESI+) mass spectrum of monodentate G2.5(COOPt(NH<sub>3</sub>)<sub>2</sub>Cl)<sub>32</sub> metallodendrimer.

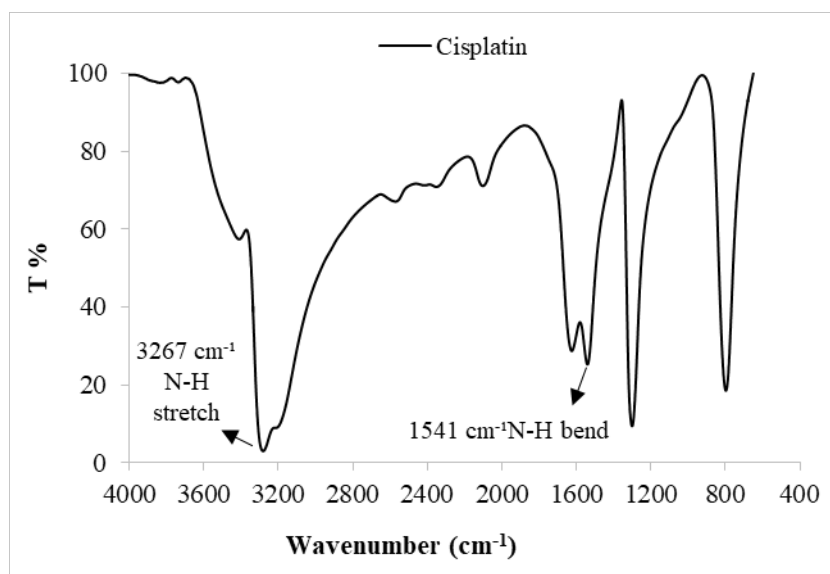

**Figure S23:** FTIR spectra of cisplatin in KBr pellet.



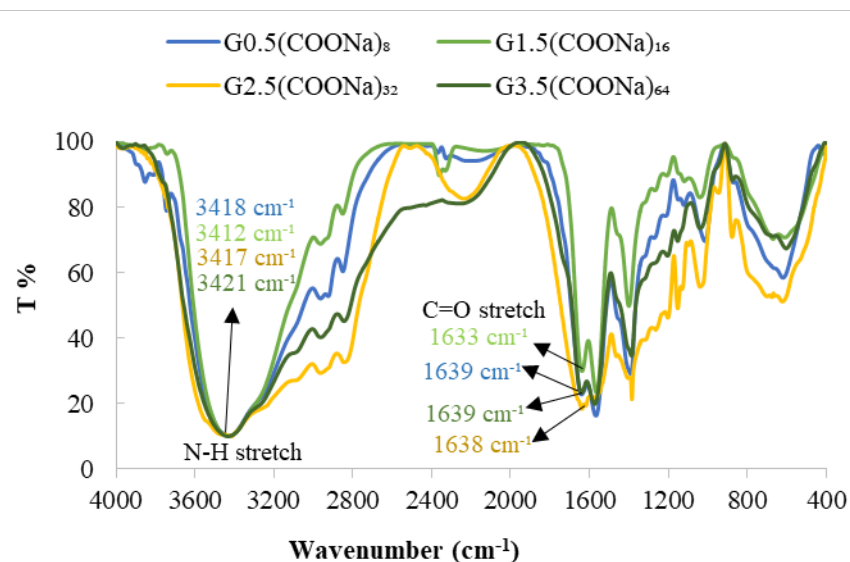

**Figure S24:** FTIR spectra of different generations of anionic PAMAM dendrimers (G0.5-G3.5) in KBr pellet.

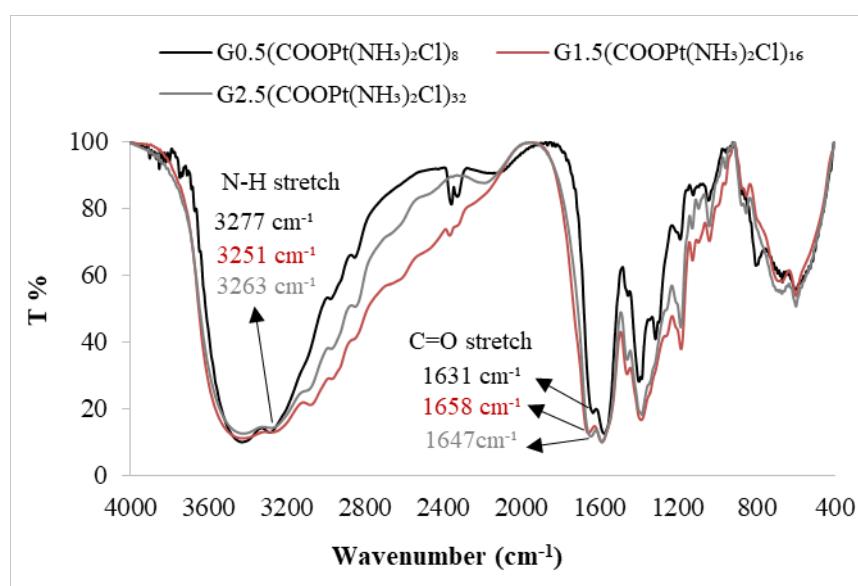

**Figure S25:** FTIR spectra of metallodendrimers conjugated with cisplatin in monodentate form. The spectra were performed in KBr pellet.



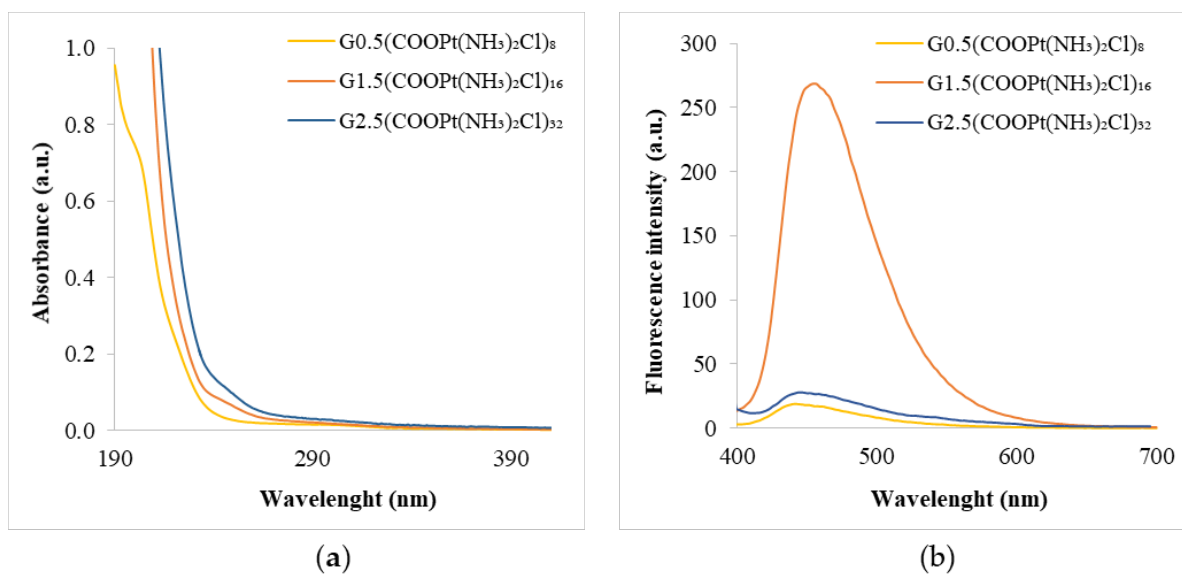

**Figure S26:** a) Absorption spectra of cisplatin-metallodendrimers in the monodentate form recorded at a concentration of 40  $\mu\text{M}$  in ultrapure water and b) Emission ( $\lambda_{\text{ex}} = 380 \text{ nm}$ ) spectra of cisplatin-metallodendrimers in the monodentate form recorded at a concentration of 500  $\mu\text{M}$  in ultrapure water.

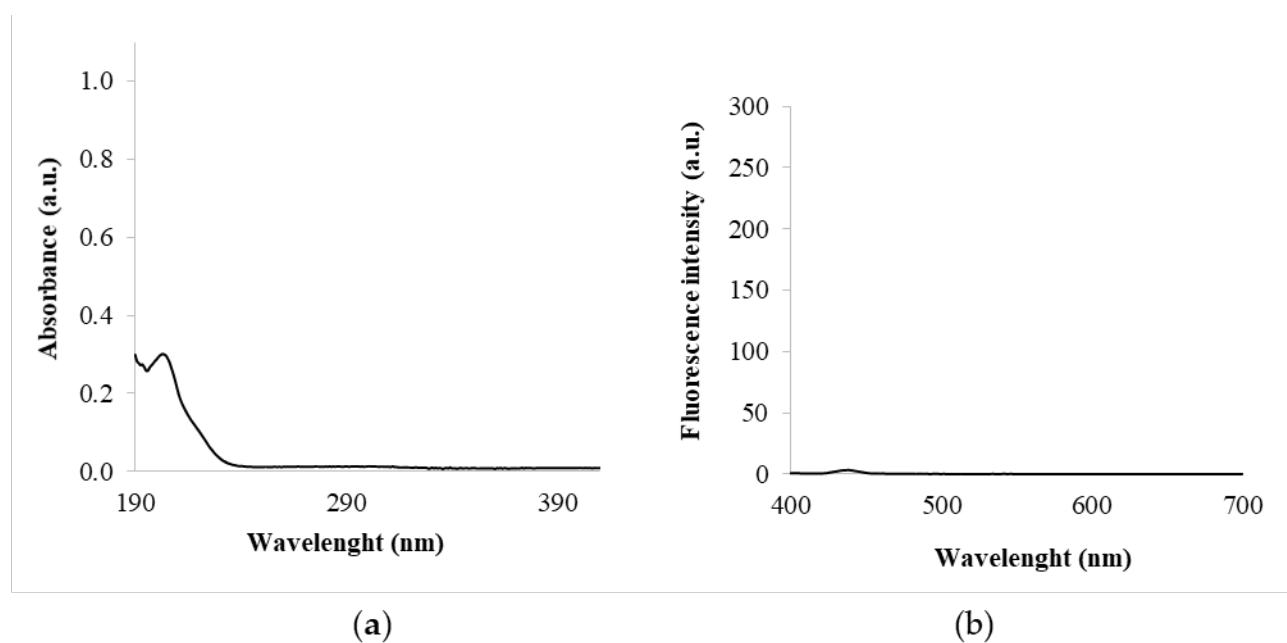

**Figure S27:** a) Absorption spectra of cisplatin recorded at a concentration of 40  $\mu\text{M}$  of in ultrapure water and b) Emission ( $\lambda_{\text{ex}} = 380 \text{ nm}$ ) spectra of cisplatin recorded at a concentration of 500  $\mu\text{M}$  in ultrapure water.

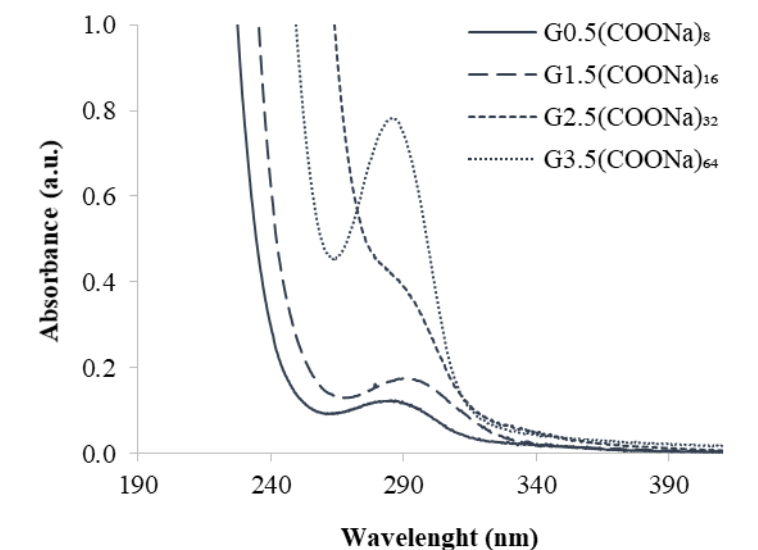

**Figure S28:** UV-Vis spectra of anionic PAMAM dendrimers at a concentration of 500  $\mu\text{M}$  in ultrapure water.

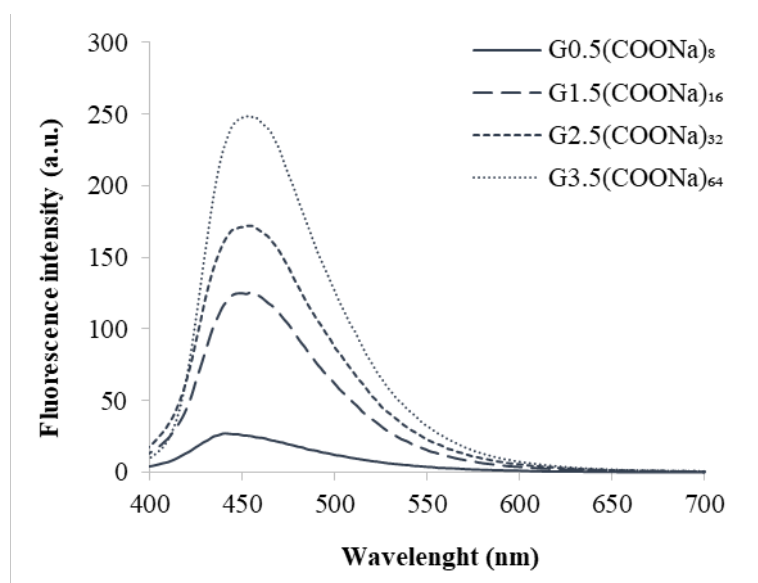

**Figure S29:** Emission ( $\lambda_{\text{ex}} = 380 \text{ nm}$ ) of anionic PAMAM dendrimers at a concentration of 500  $\mu\text{M}$  in ultrapure water.

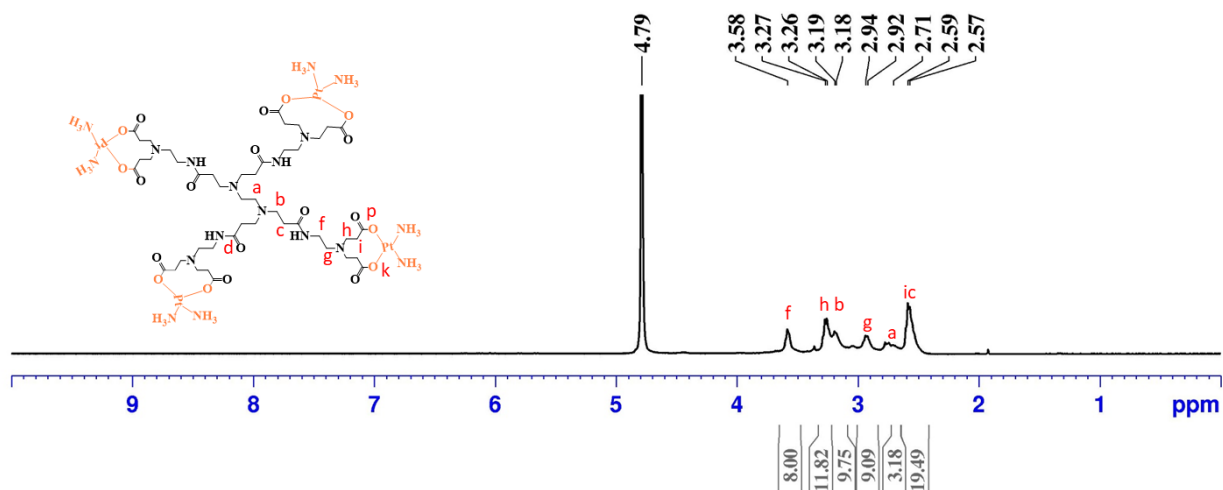

**Figure S30:**  $^1H$ -NMR spectrum of bidentate  $G0.5(COOPt(NH_3)_2)_4$  in  $D_2O$ .

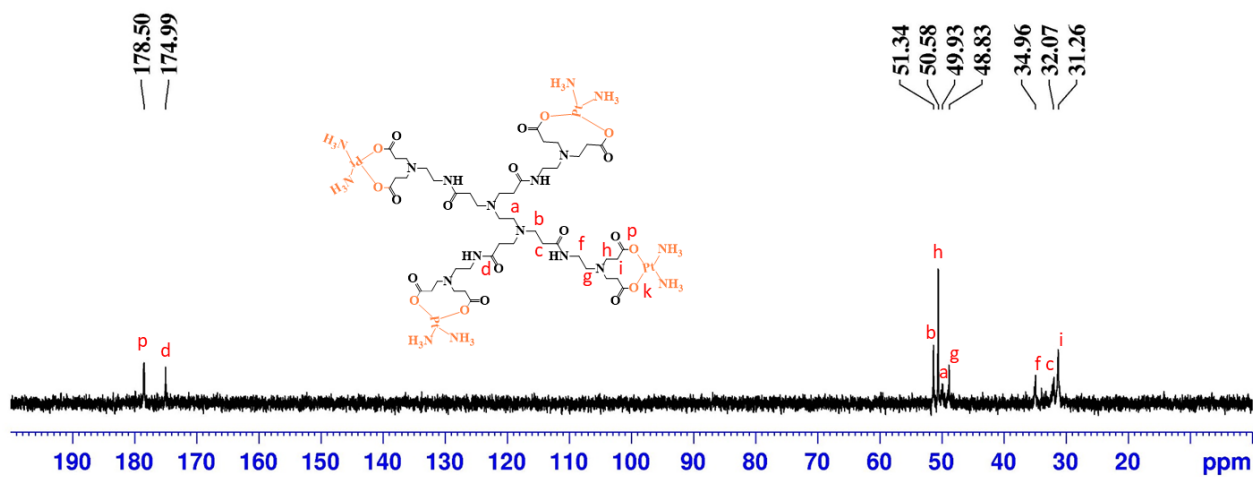

**Figure S31:**  $^{13}C$ -NMR spectrum of bidentate  $G0.5(COOPt(NH_3)_2)_4$  in  $D_2O$ .

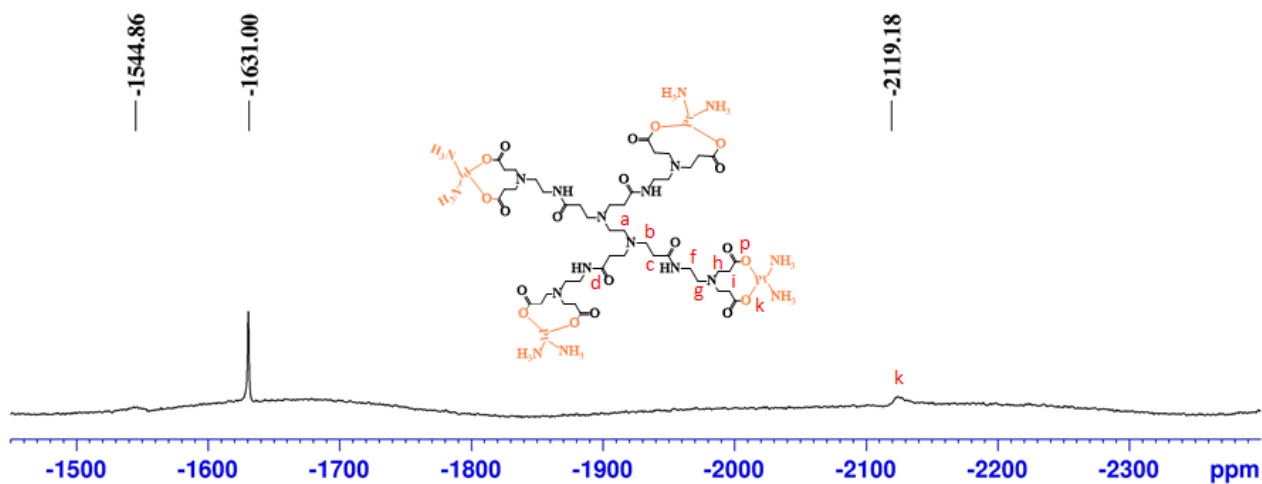

**Figure S32:**  $^{195}\text{Pt}$ -NMR spectrum of bidentate  $\text{G0.5COO}(\text{Pt}(\text{NH}_3)_2)_4$  in  $\text{D}_2\text{O}$ , with  $\text{K}_2\text{PtCl}_4$  as external reference (-1631 ppm).

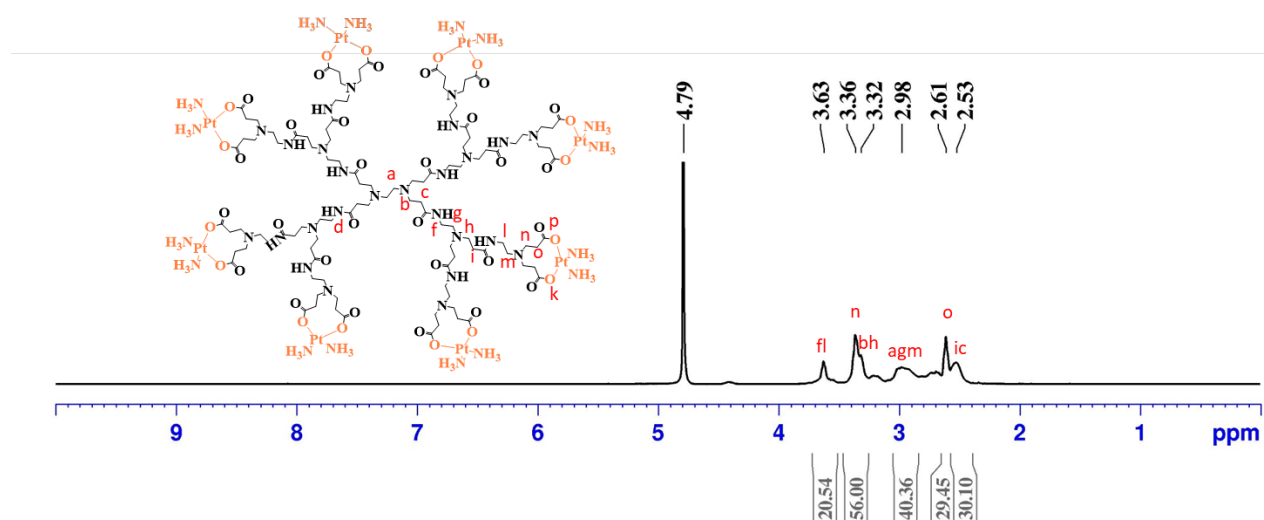

**Figure S33:**  $^1\text{H}$ -NMR spectrum of bidentate  $\text{G1.5COO}(\text{Pt}(\text{NH}_3)_2)_8$  in  $\text{D}_2\text{O}$ .

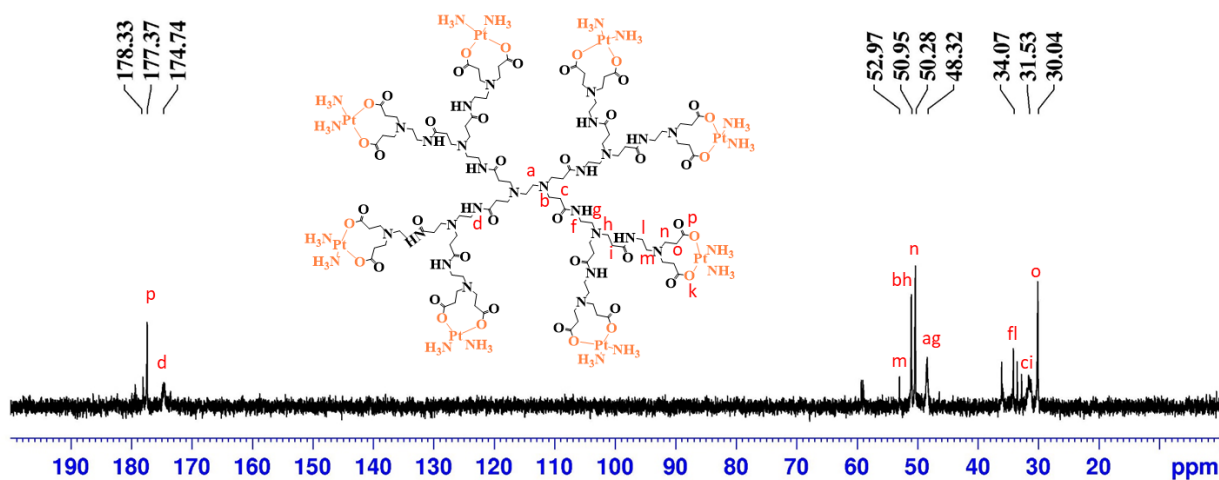

**Figure S34:** <sup>13</sup>C-NMR spectrum of bidentate G1.5COOPt(NH<sub>3</sub>)<sub>2</sub> in D<sub>2</sub>O.

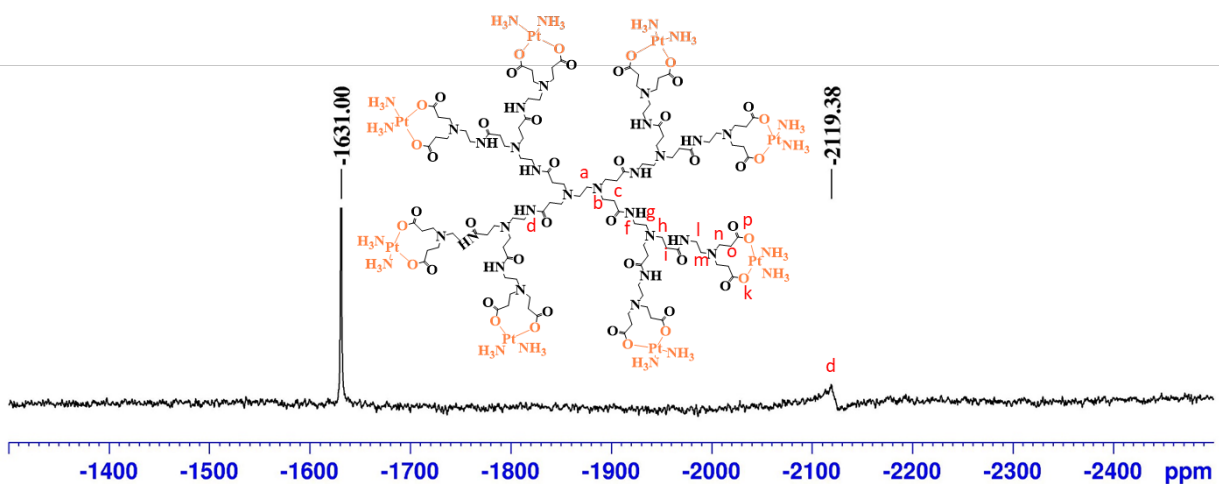

**Figure S35:** <sup>195</sup>Pt-NMR spectrum of bidentate G1.5COO(Pt(NH<sub>3</sub>)<sub>2</sub>)<sub>8</sub> in D<sub>2</sub>O, with K<sub>2</sub>PtCl<sub>4</sub> as external reference (-1631 ppm).

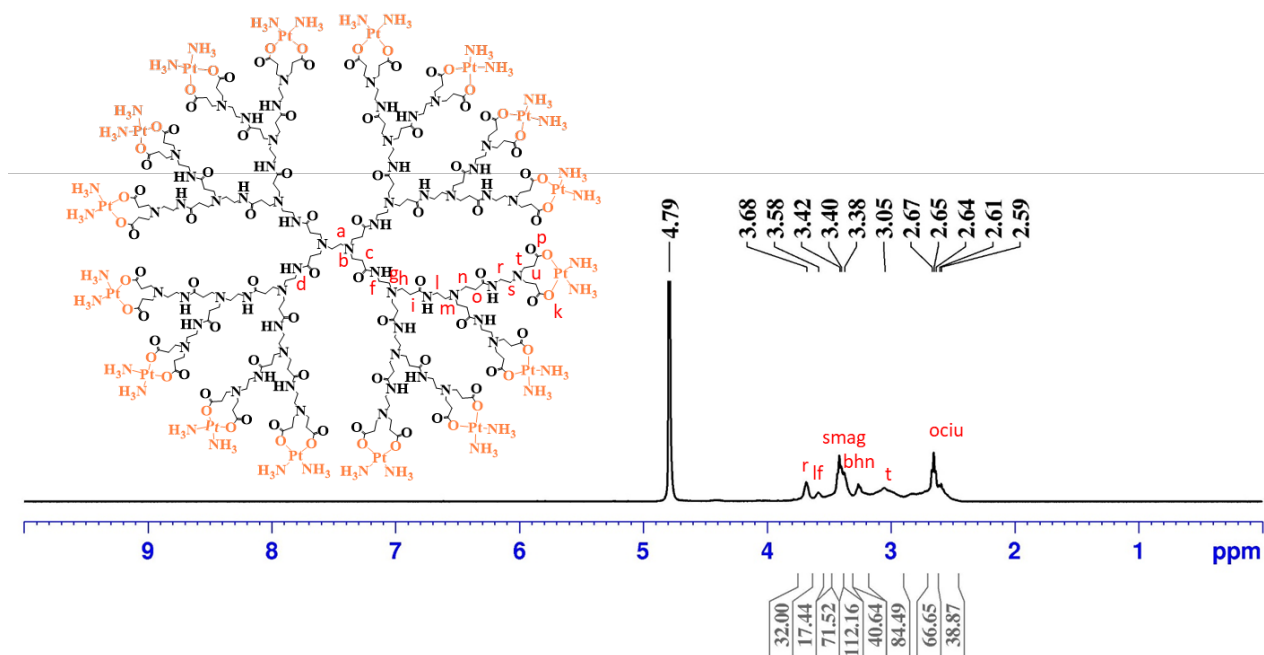

**Figure S36:** <sup>1</sup>H-NMR spectrum of bidentate G2.5COO(Pt(NH<sub>3</sub>)<sub>2</sub>)<sub>16</sub> in D<sub>2</sub>O.

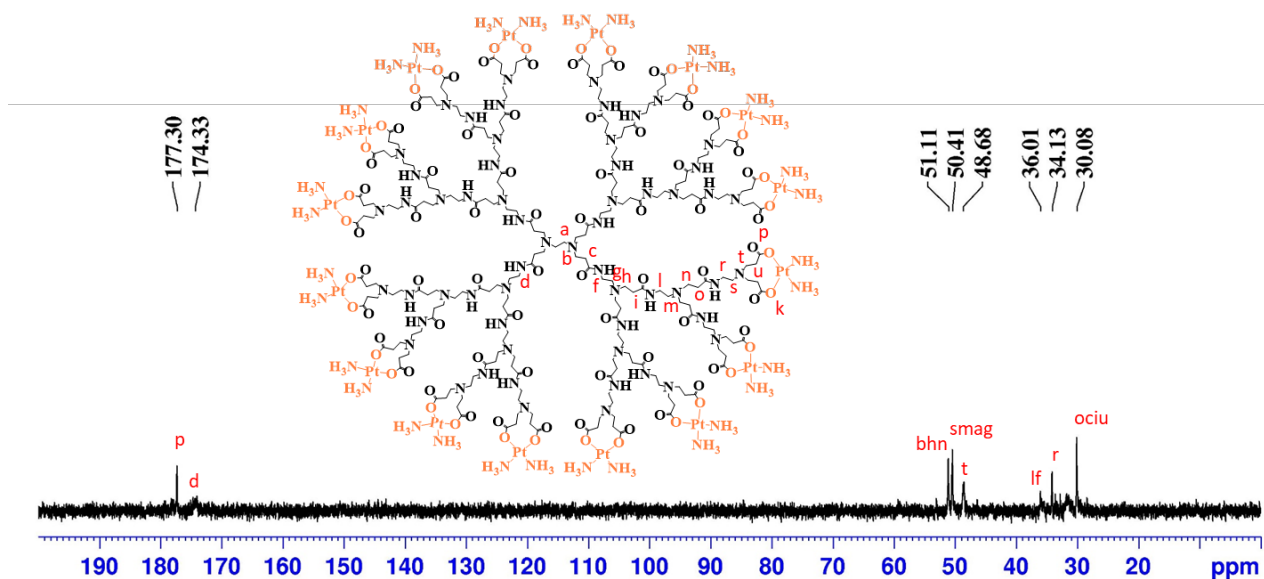

**Figure S37:** <sup>13</sup>C-NMR spectrum of bidentate G2.5COO(Pt(NH<sub>3</sub>)<sub>2</sub>)<sub>16</sub> in D<sub>2</sub>O.

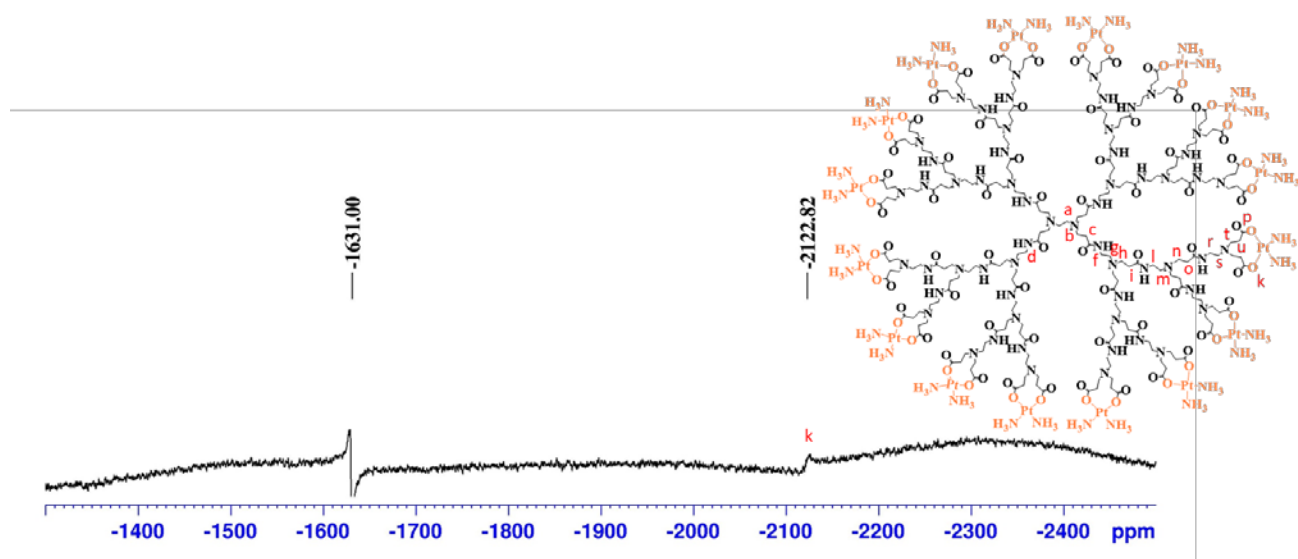

**Figure S38:**  $^{195}\text{Pt}$ -NMR spectrum of bidentate  $\text{G2.5COO}(\text{Pt}(\text{NH}_3)_2)_{16}$  in  $\text{D}_2\text{O}$ , with  $\text{K}_2\text{PtCl}_4$  as external reference ( $-1631$  ppm).

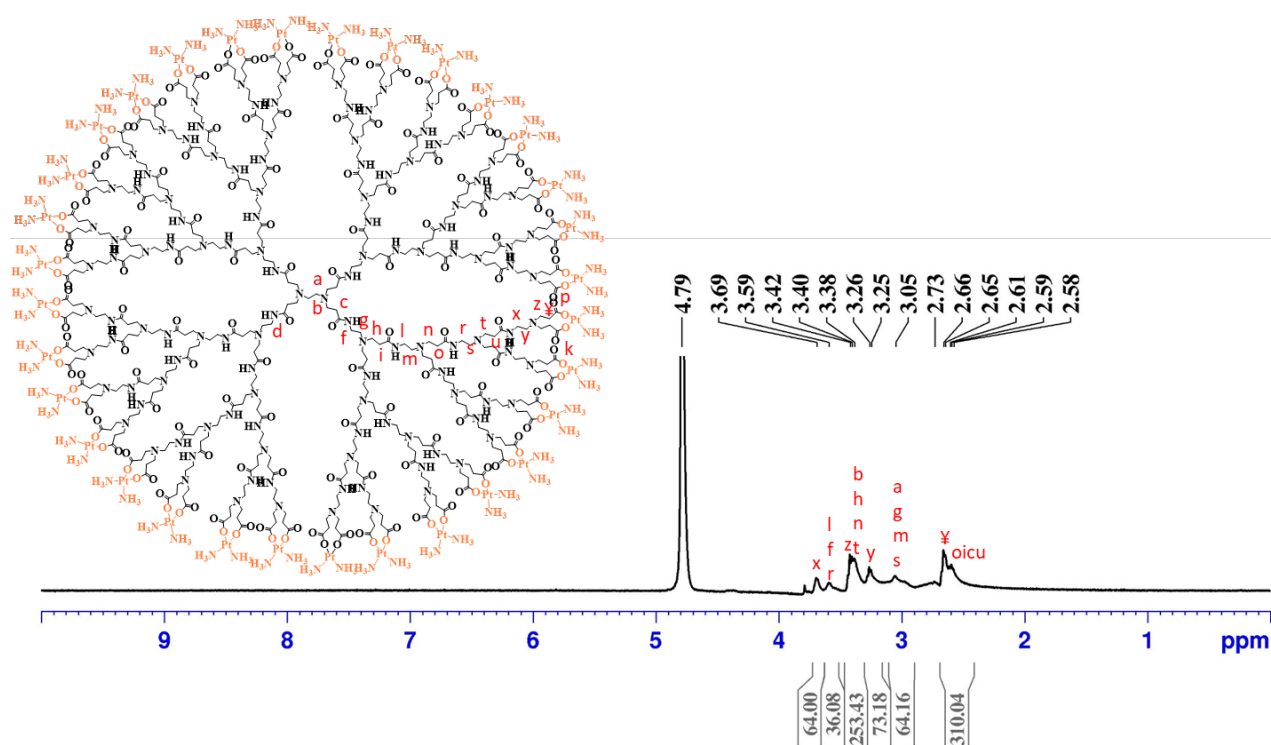

**Figure S39:**  $^1\text{H}$ -NMR spectrum of bidentate  $\text{G3.5COO}(\text{Pt}(\text{NH}_3)_2)_{32}$  in  $\text{D}_2\text{O}$ .

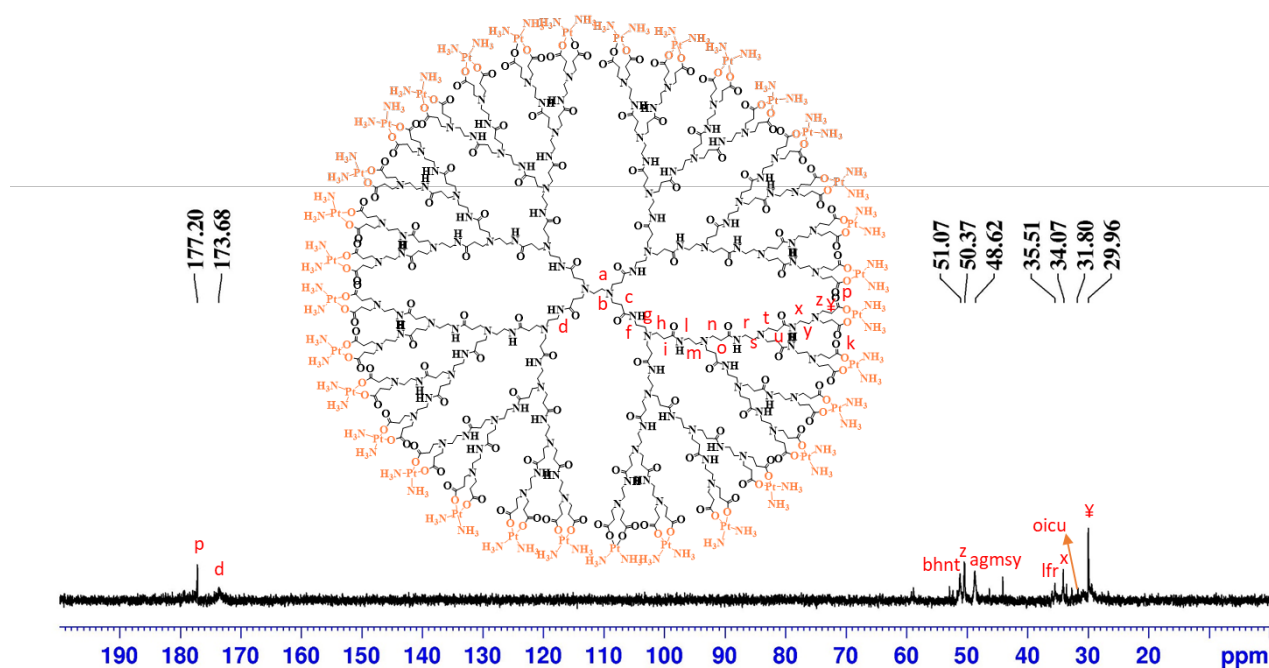

**Figure S40:** <sup>13</sup>C-NMR spectrum of bidentate G3.5COO(Pt(NH<sub>3</sub>)<sub>2</sub>)<sub>32</sub> in D<sub>2</sub>O.

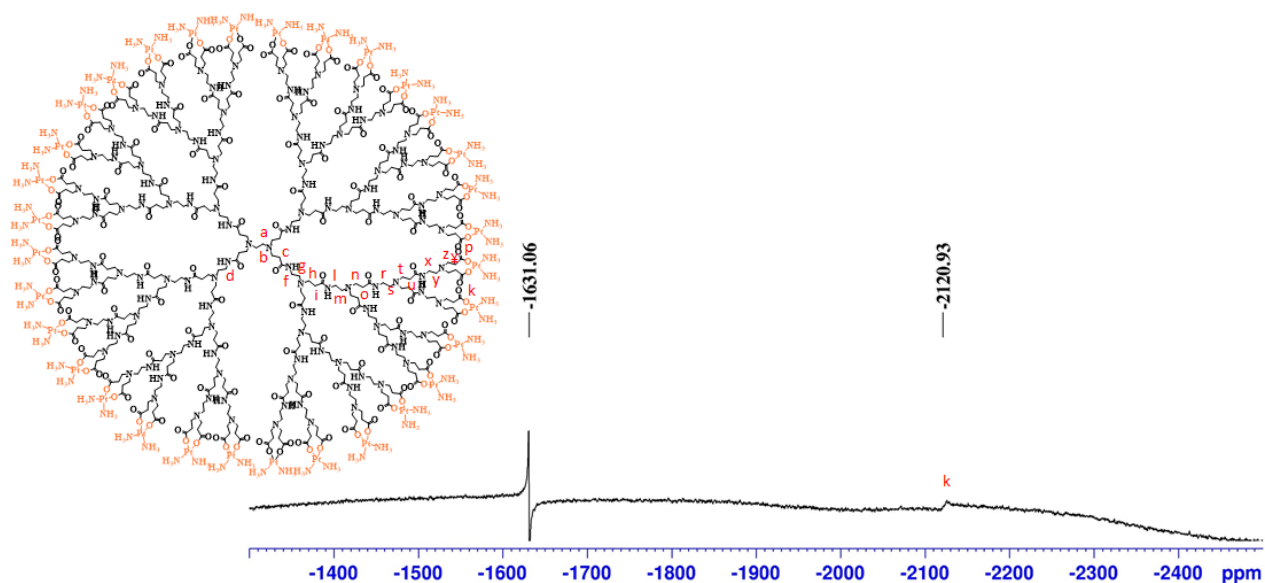

**Figure S41:** <sup>195</sup>Pt-NMR spectrum of bidentate G3.5COO(Pt(NH<sub>3</sub>)<sub>2</sub>)<sub>32</sub> in D<sub>2</sub>O, with K<sub>2</sub>PtCl<sub>4</sub> as external reference (-1631 ppm).



**Table S2:** Molecular weight of the cisplatin-metallodendrimers in a bidentate form.

|                         | G0.5COO(Pt(NH <sub>3</sub> ) <sub>2</sub> ) <sub>4</sub>                                                      | G1.5COO(Pt(NH <sub>3</sub> ) <sub>2</sub> ) <sub>8</sub>                                        | G2.5COO(Pt(NH <sub>3</sub> ) <sub>2</sub> ) <sub>16</sub>                                        | G3.5COO(Pt(NH <sub>3</sub> ) <sub>2</sub> ) <sub>32</sub>                                         |
|-------------------------|---------------------------------------------------------------------------------------------------------------|-------------------------------------------------------------------------------------------------|--------------------------------------------------------------------------------------------------|---------------------------------------------------------------------------------------------------|
| <b>Molecular weight</b> | 2001.72                                                                                                       | 4399.92                                                                                         | 9196.34                                                                                          | 18789.17                                                                                          |
| <b>m/z calculated</b>   | 1023.27                                                                                                       | 1466.80                                                                                         | 4598.51                                                                                          | 974.82                                                                                            |
| <b>m/z found</b>        | 1023.27<br>[M+2Na <sup>+</sup> ] <sup>2+</sup>                                                                | 1466.83<br>[M+3H <sup>+</sup> ] <sup>3+</sup>                                                   | 4597.5<br>[M+2H <sup>+</sup> ] <sup>2+</sup>                                                     | 974.64<br>[M+H <sup>+</sup> ] <sup>+</sup>                                                        |
|                         | C <sub>46</sub> H <sub>96</sub> N <sub>18</sub> Na <sub>2</sub> O <sub>20</sub> Pt <sub>4</sub> <sup>2+</sup> | C <sub>110</sub> H <sub>227</sub> N <sub>42</sub> O <sub>44</sub> Pt <sub>8</sub> <sup>3+</sup> | C <sub>238</sub> H <sub>482</sub> N <sub>90</sub> O <sub>92</sub> Pt <sub>16</sub> <sup>2+</sup> | C <sub>494</sub> H <sub>981</sub> N <sub>180</sub> O <sub>188</sub> Pt <sub>29</sub> <sup>+</sup> |

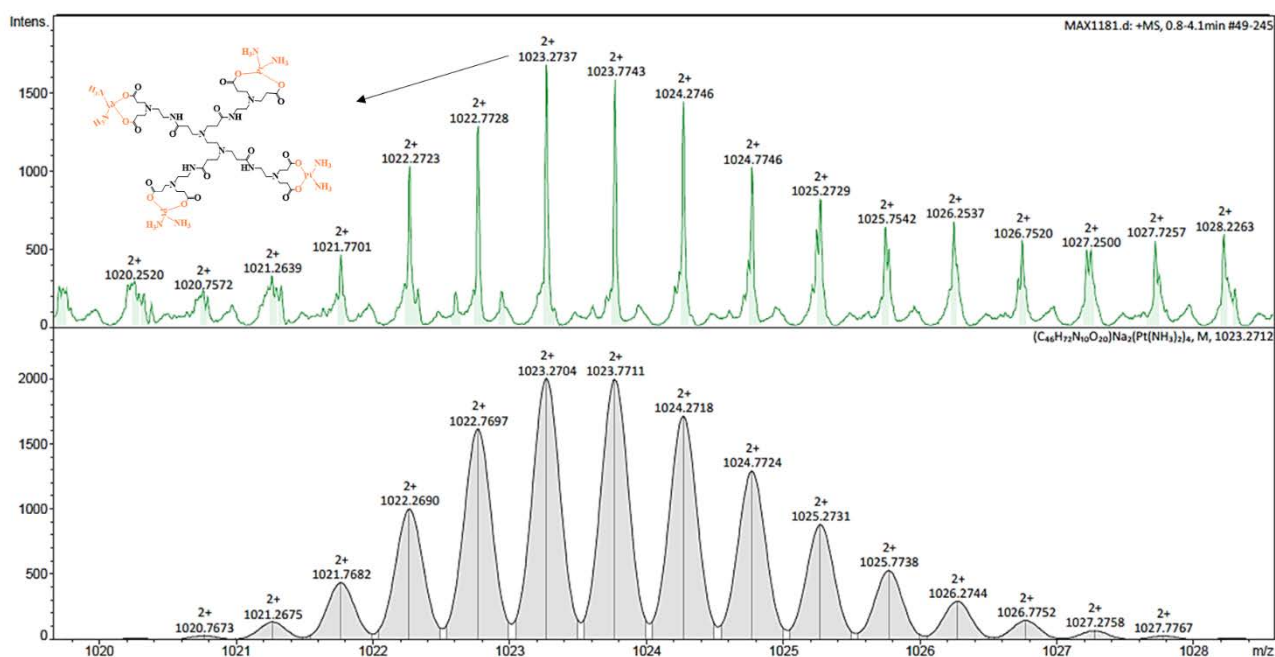

**Figure S42:** TOF-MS (ESI+) mass spectrum of bidentate G0.5COO(Pt(NH<sub>3</sub>)<sub>2</sub>)<sub>4</sub> metallodendrimer.

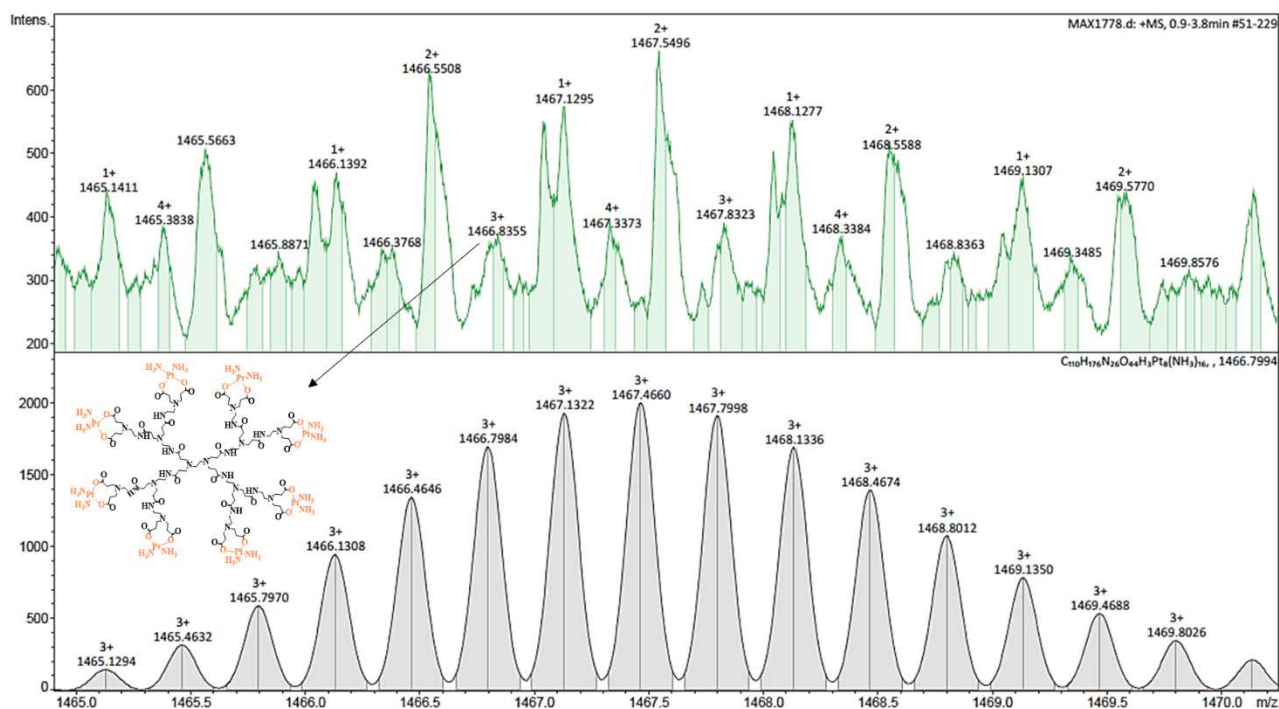

Figure S43: TOF-MS (ESI+) mass spectrum of bidentate G1.5COO(Pt(NH<sub>3</sub>)<sub>2</sub>)<sub>8</sub> metallodendrimer.

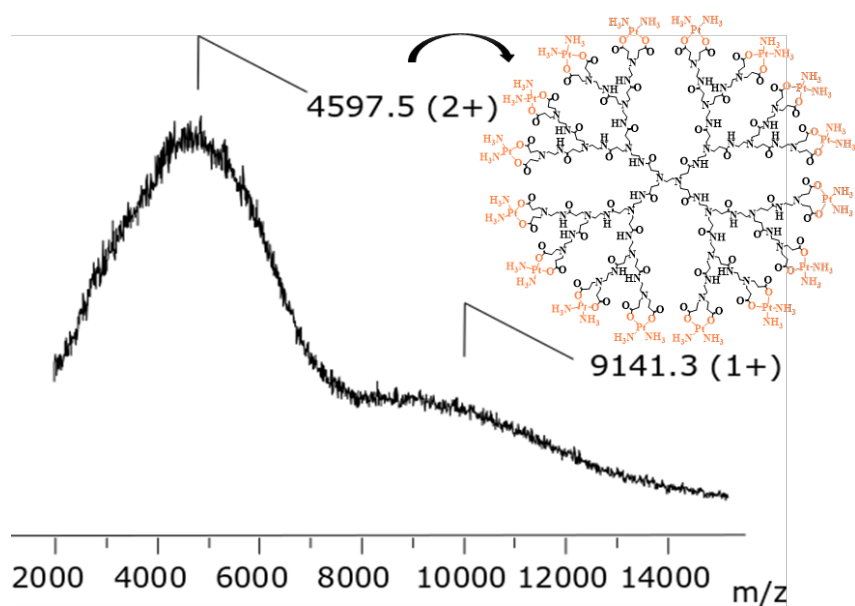

Figure S44: TOF-MS (MALDI) mass spectrum of bidentate G2.5COO(Pt(NH<sub>3</sub>)<sub>2</sub>)<sub>16</sub> metallodendrimer.

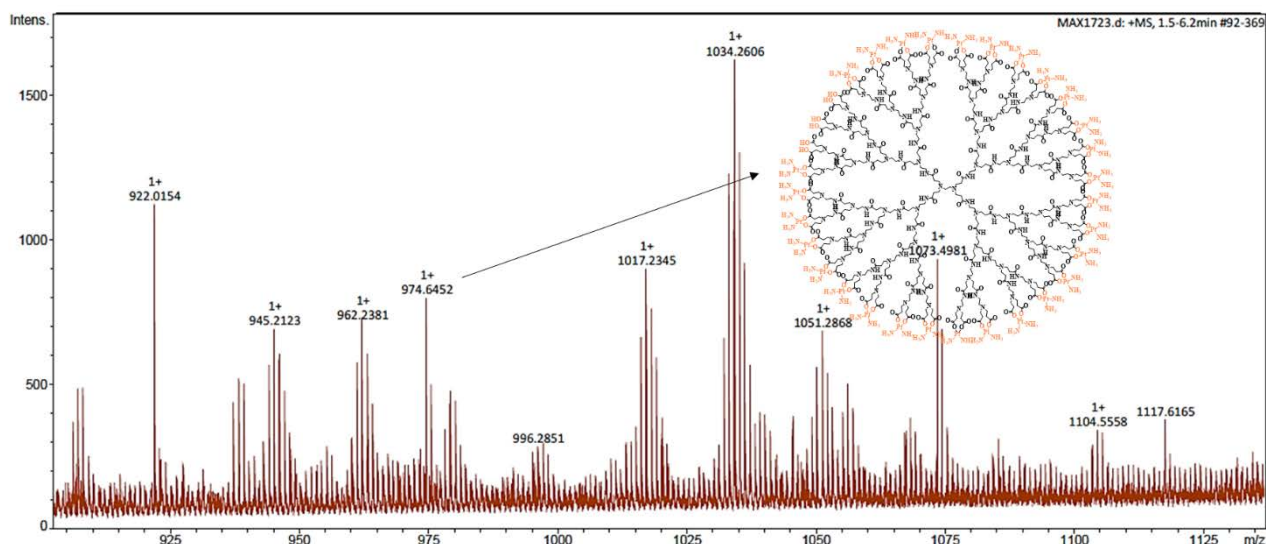

**Figure S45:** TOF-MS (ESI+) mass spectrum of bidentate G3.5COO(Pt(NH<sub>3</sub>)<sub>2</sub>)<sub>32</sub> metallodendrimer.

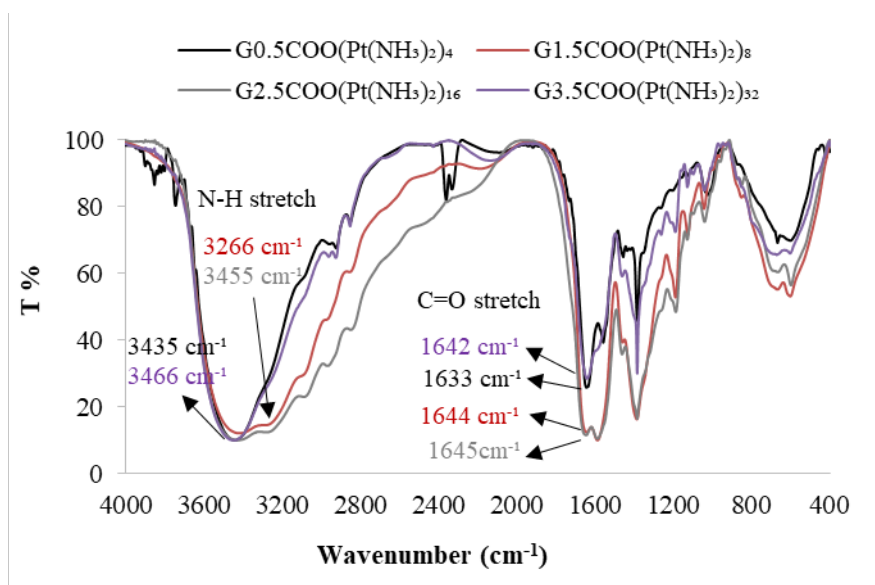

**Figure S46:** FTIR spectrum of metallodendrimers conjugated with cisplatin in bidentate form. The spectrum was performed in KBr pellet.

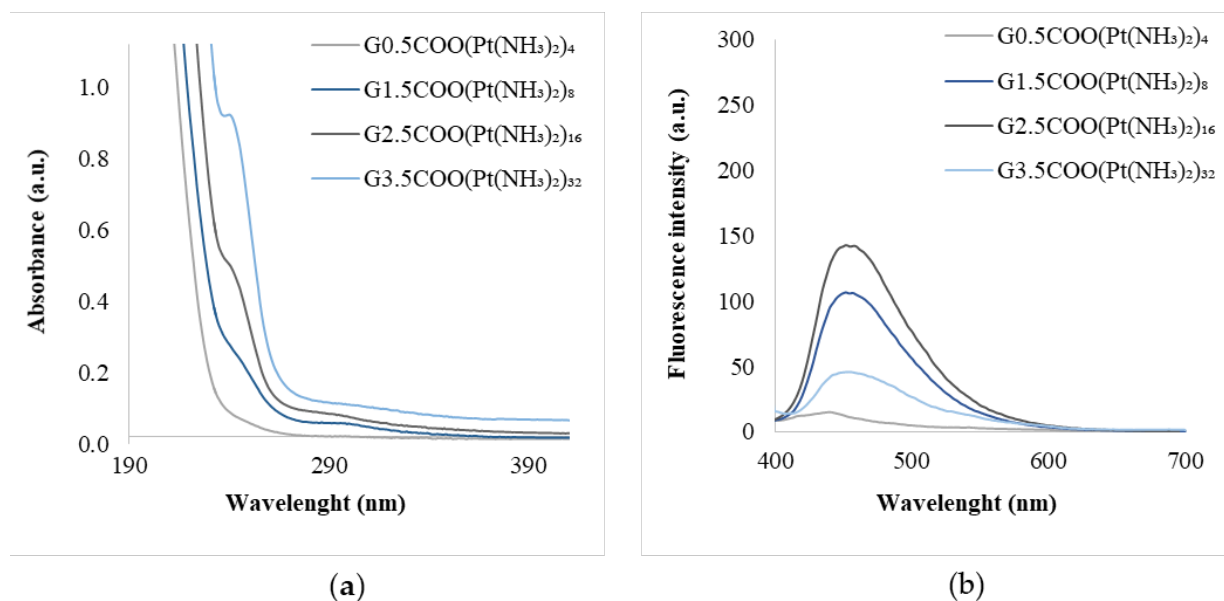

**Figure S47:** a) Absorption spectra of cisplatin-metallodendrimers in the bidentate form recorded at a concentration of 40  $\mu\text{M}$  in ultrapure water and b) Emission ( $\lambda_{\text{ex}} = 380 \text{ nm}$ ) spectra of cisplatin-metallodendrimers in the bidentate form recorded at a concentration of 500  $\mu\text{M}$  in ultrapure water.

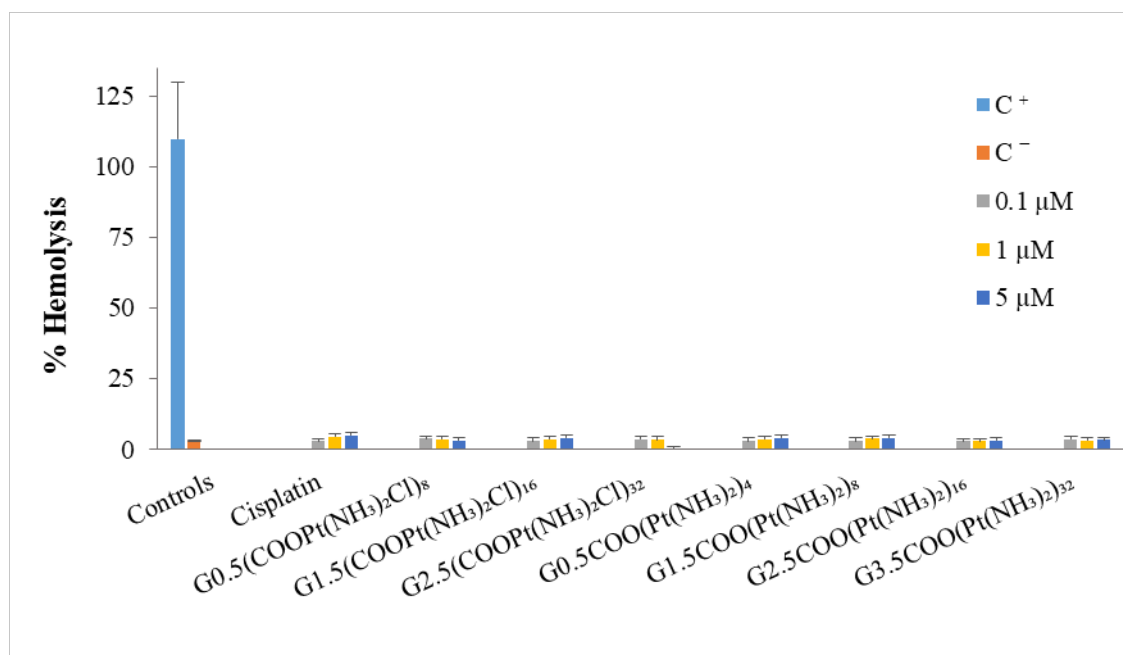

**Figure S48:** Hematoxicity of the free cisplatin and prepared cisplatin-metallodendrimers in healthy human blood. Blood was treated for 3 h with different concentrations (0.1, 1, and 5  $\mu\text{M}$ ) of the metallodendrimers and free cisplatin. The positive and negative control are represented by C<sup>+</sup> and C<sup>-</sup>, respectively. The results are expressed as mean  $\pm$  SD of at least three independent experiments performed in triplicate.

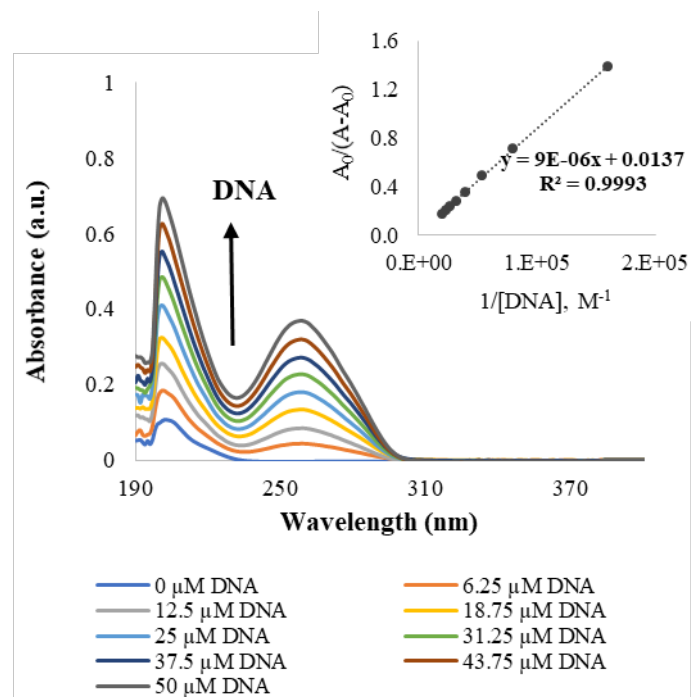

**Figure S49:** Representative UV-visible spectra of cisplatin with increasing concentration of CT-DNA (0, 6.25, 12.5, 18.75, 25, 31.25, 37.5, 43.75 and 50  $\mu\text{M}$ ) in 5 mM Tris-HCl/50 mM NaCl at pH 7.4. The inset corresponds to the plot of  $A_0/(A-A_0)$  versus  $1/[\text{DNA}]$ , which is used to determine the binding constant. The arrow indicates the direction of increasing the concentration of DNA.
